# Supplementary material for: Dialkylgallium alkoxides – a tool for facile and stereoselective synthesis of PLA–drug conjugates
Source: Royal Society of Chemistry journal article supplement (doi:10.1039/c7nj03089d), 2017-01-01
Supplement: c7nj03089d1.pdf [file c7nj03089d1.pdf]

## Supporting Information

### Dialkylgallium alkoxides – a tool for facile and stereoselective synthesis of PLA-drug conjugates

Martyna Cybularczyk-Cecotka,<sup>ab</sup> Rafał Zaremba,<sup>ab</sup> Aleksander Hurko,<sup>ac</sup> Andrzej Plichta,<sup>c</sup> Maciej Dranka,<sup>c</sup> and Paweł Horeglad<sup>a\*</sup>

<sup>a</sup>Centre of New Technologies, University of Warsaw, Banacha 2c, 02-097, Warsaw, Poland.

<sup>b</sup>Faculty of Chemistry, University of Warsaw, Pasteura 1, 02-093, Warsaw, Poland.

<sup>c</sup>Faculty of Chemistry, Warsaw University of Technology, Noakowskiego 3, 00-664, Warsaw, Poland.

|                                                                        |         |
|------------------------------------------------------------------------|---------|
| 1) Procedure of synthesis of gallium complexes 1-3 and PLA.....        | S1-S2   |
| 2) NMR spectrums of gallium complexes 1-3 (Figures S1-S6).....         | S3-S5   |
| 3) NMR data of PLA (Figures S6-S52).....                               | S6-28   |
| 4) MALDI-TOF of PLA (Figures S52-S71).....                             | S29-S42 |
| 5) GPC data of PLA (Figure S72).....                                   | S43     |
| 6) Crystallographic data of gallium complexes 1-3 (Tables S1-S22)..... | S44-S45 |

#### GENERAL REMARKS

All operations were carried out under dry argon using standard Schlenk techniques. Solvents and reagents were purified and dried prior to use. Deuterated solvents were dried over potassium (toluene- $d_8$ ), calcium hydride ( $CD_2Cl_2$ ). All solvents were purified using MBRAUN Solvent Purification Systems (MB-SPS-800). L-Lactide and *rac*-Lactide were purchased from Aldrich and further purified by crystallization from anhydrous toluene and sublimed under vacuum. (*S*)-methyl lactate was purchased from Aldrich, dried over molecular sieves and distilled under argon. 2-methoxyphenol, 2-(methylamino)ethanol and 2-(isopropylamino)ethanol were purchased from Aldrich and dried over molecular sieves.  $HN(iPr)CH_2CH(CH_2OPh)OH$  and Atenolol were purchased from ABCR and used as received. For the synthesis of **3**  $HN(iPr)CH_2CH(CH_2OPh)OH$  was sublimed under vacuum.  $Me_3Ga$  was purchased from Strem Chemicals, Inc. and used as received.  $^1H$  NMR spectra were recorded on Agilent 400-MR DD2 400 MHz with shifts given in ppm according to deuterated solvent shift. Measurements of molar masses and  $\bar{M}_w/\bar{M}_n$  were performed with GPC using Malvern (Viscotek) GPCmax coupled with TDA 305 Triple Detector Array (TDA) equipped with one analytical column by Jordi Labs DVB Mixed Bed and dichloromethane as eluent (flow rate of  $1\text{ mL min}^{-1}$ ) at 30 °C. MALDI-TOF spectra were recorded on a Bruker ultrafleXtreme mass spectrometer. MALDI-TOF spectra (Figure S66 – S68) were recorded on Shimadzu/Kratos, Axima Performance. (*S,S*)- $[Me_2Ga(\mu-OCH(Me)CO_2Me)]_2$  was synthesized according to the literature.<sup>1</sup>  $[Me_2Ga(OArOMe)]_2$  was synthesized, analogously to (*S,S*)- $[Me_2Ga(\mu-OCH(Me)CO_2Me)]_2$ , in the reaction of 2-methoxyphenol with trimethyl gallium – a generally used method for the synthesis of dialkylgallium alkoxides and aryloxides.

#### Synthesis of **1**:

A stirred solution of  $Me_3Ga$  (0.690 g, 6.0 mmol) in methylene chloride (10 mL) was cooled to  $-78\text{ }^\circ\text{C}$ , and the solution of  $HN(Me)C_2H_4OH$  (0,450 g, 6 mmol) in  $CH_2Cl_2$  (1 ml) was added dropwise. After addition the reaction mixture was allowed to warm to a room temperature and stirred for 2 hours until gas evolution essentially ceased. Then, methylene chloride was removed under vacuum to give a white solid, which was subsequently recrystallized from  $CH_2Cl_2$ /hexane solution at  $-20\text{ }^\circ\text{C}$  to give white

crystals, which were washed twice with 3 mL of hexane and dried under vacuum to give **1** (0.854 g, 89%).

**Anal. Calcd for C<sub>5</sub>H<sub>14</sub>GaON:** C, 34.54; H, 8.12; N, 8.06. **Found:** C, 33.34; H, 8.20; N, 6.96.

**<sup>1</sup>H NMR (CD<sub>2</sub>Cl<sub>2</sub>, 400 MHz):** -0.49 (s, 6H, GaCH<sub>3</sub>), 2.36 (s, 3H, NCH<sub>3</sub>), 2.68 (t, <sup>3</sup>J(H,H)= 6.0 Hz, 2H, CH<sub>2</sub>), 3.62 (t, <sup>3</sup>J(H,H)= 6.0 Hz, 2H, CH<sub>2</sub>).

**<sup>13</sup>C NMR (CD<sub>2</sub>Cl<sub>2</sub>, 100MHz):** -7.1, 35.2, 53.7, 59.7.

#### Synthesis of **2**:

A stirred solution of Me<sub>3</sub>Ga (0.197 g, 1.72 mmol) in methylene chloride (5 mL) was cooled to -78 C, and the solution of HN(<sup>i</sup>Pr)<sub>2</sub>CH<sub>2</sub>OH (0.177 g, 1.72 mmol) in CH<sub>2</sub>Cl<sub>2</sub> (1 ml) was added dropwise. After addition the reaction mixture was allowed to warm to a room temperature and stirred for 2 hours until gas evolution essentially ceased. Then methylene chloride was removed under vacuum to give a white solid, which was subsequently recrystallized from CH<sub>2</sub>Cl<sub>2</sub>/hexane solution at -20 °C to give white crystals, which were washed twice with 3 mL of hexane and dried under vacuum to give **2** (0.236 g, 68%).

**Anal. Calcd for C<sub>7</sub>H<sub>18</sub>GaON:** C, 41.63; H, 8.98; N, 6.94. **Found:** C, 41.48; H, 9.01; N, 6.76.

**<sup>1</sup>H NMR (CD<sub>2</sub>Cl<sub>2</sub>, 400 MHz):** -0.43 (s, 6H, GaCH<sub>3</sub>), 1.14 (d, <sup>3</sup>J(H,H)= 6.4 Hz, 6H, CH(CH<sub>3</sub>)<sub>2</sub>), 2.69 (br, 2H, CH<sub>2</sub>), 2.84-2.88 (m, 1H, CH(CH<sub>3</sub>)<sub>2</sub>), 3.68 (br T, 2H, CH<sub>2</sub>);

**<sup>13</sup>C NMR (CD<sub>2</sub>Cl<sub>2</sub>, 100MHz):** -5.9, 23.2, 50.1, 50.5, 62.3.

#### Synthesis of **3**:

A stirred solution of Me<sub>3</sub>Ga (0.267 g, 2.3 mmol) in methylene chloride (5 mL) was cooled to -78 C, and the solution of HN(<sup>i</sup>Pr)CH<sub>2</sub>CH(CH<sub>2</sub>O<sup>i</sup>Pr)OH (0.486 g, 2.3 mmol) in CH<sub>2</sub>Cl<sub>2</sub> (1 ml) was added dropwise. After addition the reaction mixture was allowed to warm to a room temperature and stirred for 2 hours until gas evolution essentially ceased. Solvent and volatile residues were then removed under vacuum to give yellow oil, which was subsequently recrystallized from Et<sub>2</sub>O/hexane solution at -20 °C to give white crystals, which were washed twice with 3 mL of hexane and dried under vacuum to give **3** (0.461 g, 65%).

**Anal. Calcd for C<sub>14</sub>H<sub>24</sub>GaON:** C, 54.58; H, 7.85; N, 4.55. **Found:** C, 53.87; H, 7.80; N, 4.56.

**<sup>1</sup>H NMR (CD<sub>2</sub>Cl<sub>2</sub>, 400 MHz):** -0.33 (s, 6H, GaCH<sub>3</sub>), 1.19 (br, 6H, CH(CH<sub>3</sub>)<sub>2</sub>), 2.23 (br, 1H, NH), 2.72 (br, 1H, CH(CH<sub>3</sub>)<sub>2</sub>), 2.93 3.04 (br, 2H, CH<sub>2</sub>), 3.92 (m, 1H, CH<sub>2</sub>), 4.02 (m, 1H, CH), 4.20 (br, 1H, CHCH<sub>2</sub>), 6.90-6.96 (m, 3H, CH<sub>Ar</sub>), 7.26-7.30 (m, 2H, CH<sub>Ar</sub>);

**<sup>13</sup>C NMR (CD<sub>2</sub>Cl<sub>2</sub>, 100MHz):** -5.5, 22.93, 50.3, 52.3, 70.5, 73.2, 115.0, 121.3, 130.0, 159.4.

**Details of polymerization studies of *rac*-LA.** In a typical run, the methylene chloride solution (20 mL) of *rac*-LA (0.9 g, 6.24 mmol) and the catalyst (0.12 mmol, unless different amount was noted) (and an appropriate amount of aminoalcohol and amine, if mentioned) were thermostated for the indicated time. Each polymerization was quenched by the addition of HCl solution (5%, 50 mL). The organic phase was separated, washed twice with water (50 mL), and dried under vacuum to give PLA as a white solid. **<sup>1</sup>H NMR (CDCl<sub>3</sub>, 400 MHz):** (a) PLA signals, 1.46–1.55 (m, 3H, CHCH<sub>3</sub>), 5.10–5.23 (m, 1H, CHCH<sub>3</sub>) (b) end groups were in each case indicated on the spectra (see below).

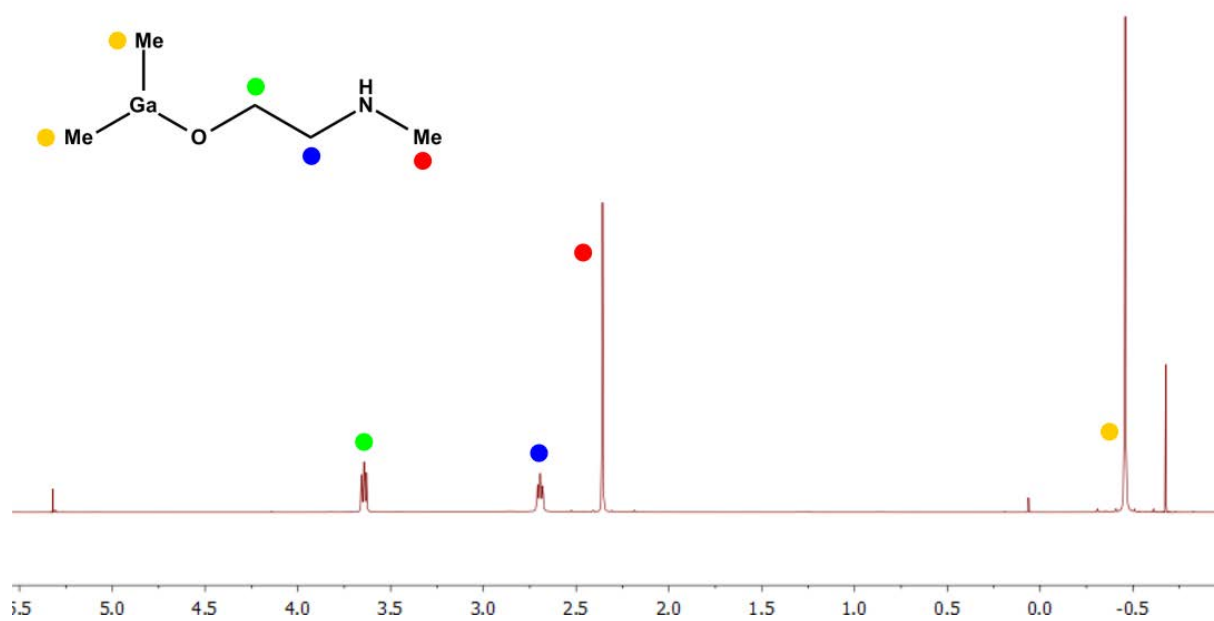

**Figure S1.**  $^1\text{H}$  NMR (CD<sub>2</sub>Cl<sub>2</sub>, 400 MHz) spectrum of **1**.

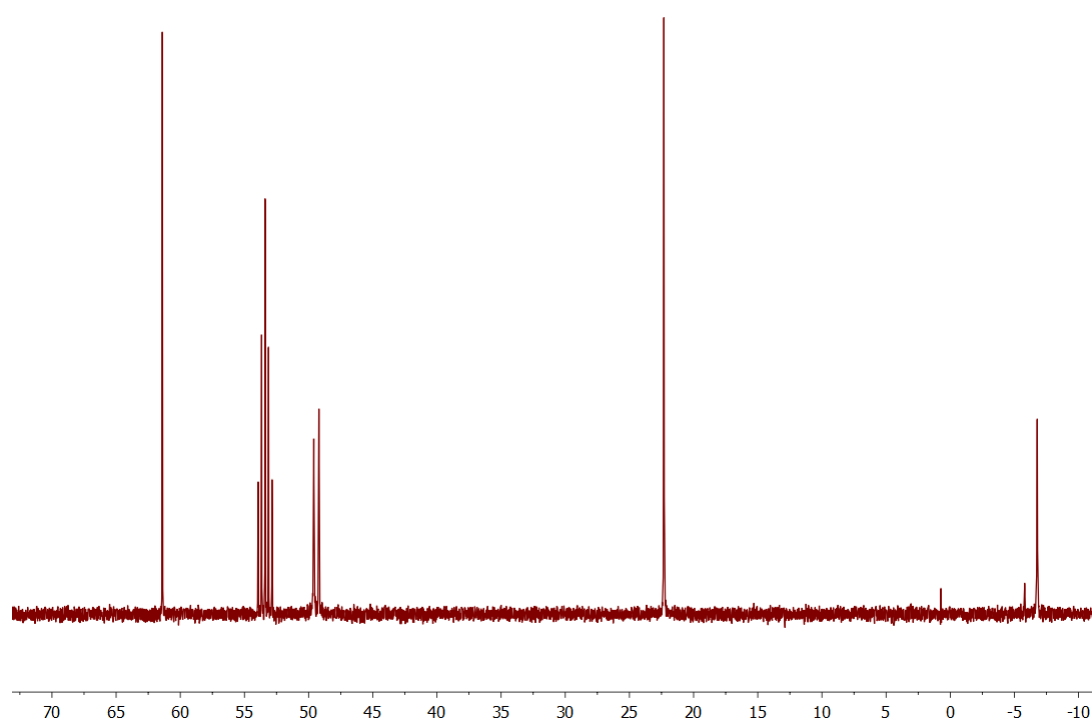

**Figure S2.**  $^{13}\text{C}$  NMR (CD<sub>2</sub>Cl<sub>2</sub>, 100 MHz) spectrum of **1**.

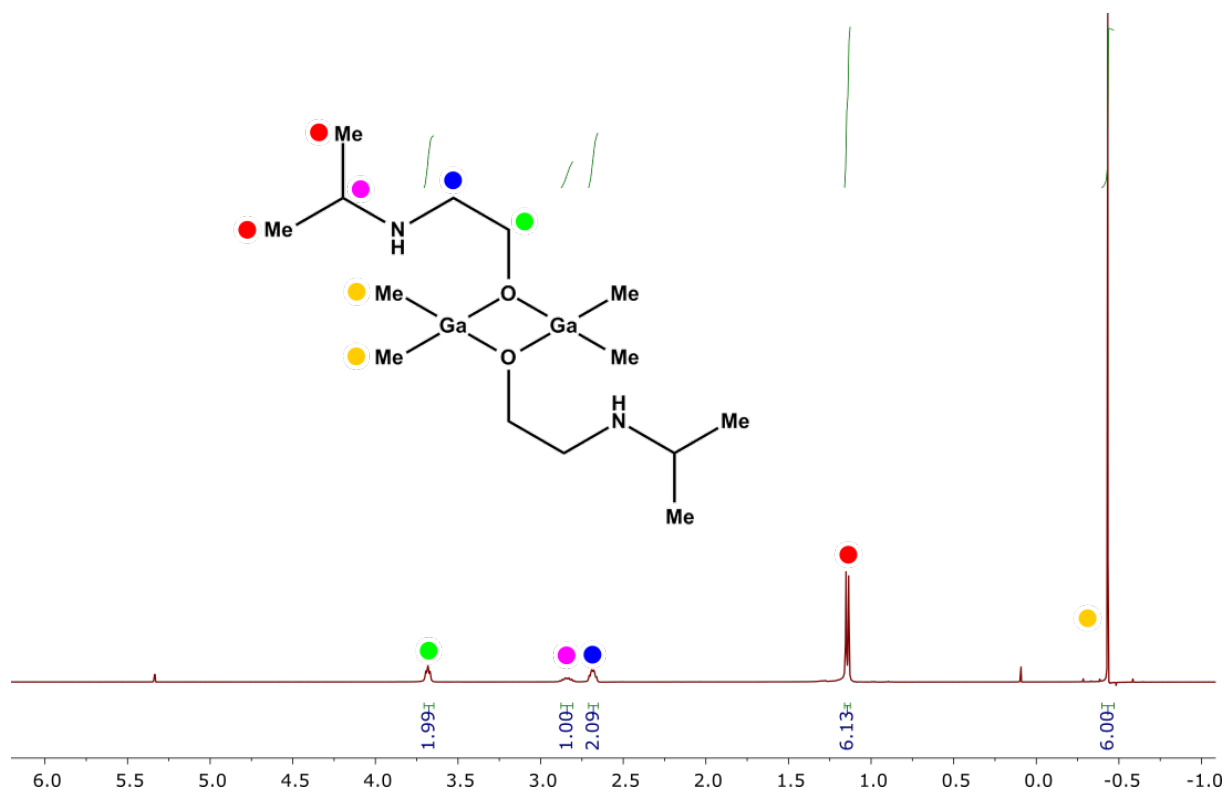

**Figure S3.** <sup>1</sup>H NMR (CD<sub>2</sub>Cl<sub>2</sub>, 400 MHz) spectrum of **2**.

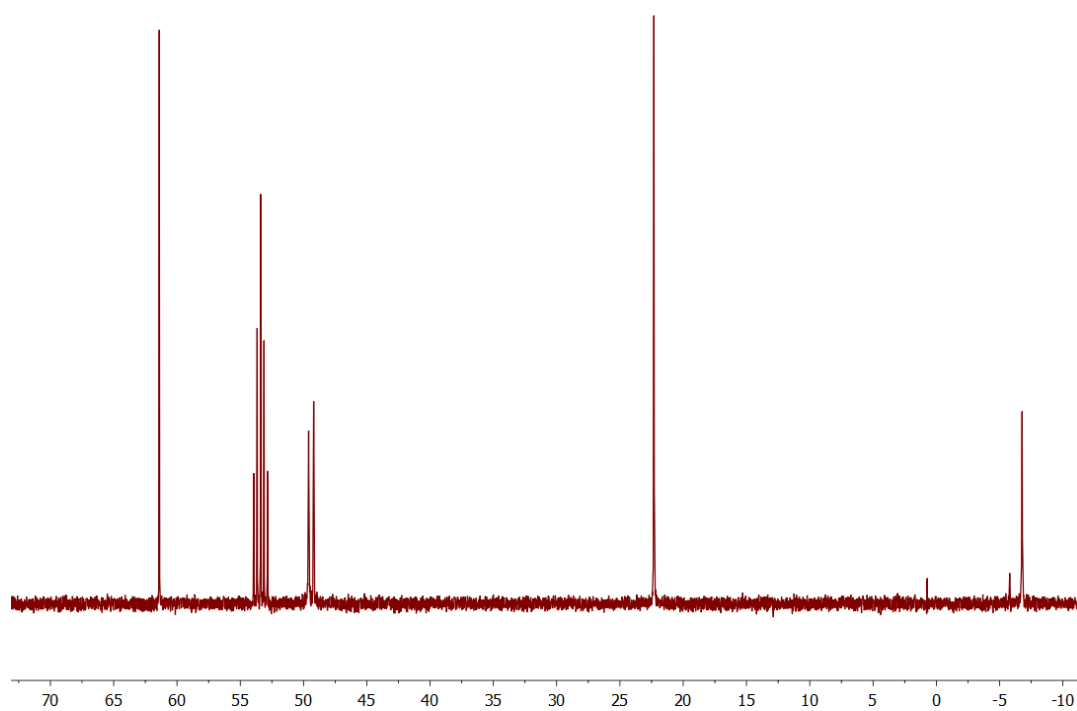

**Figure S4.** <sup>13</sup>C NMR (CD<sub>2</sub>Cl<sub>2</sub>, 100 MHz) spectrum of **2**.

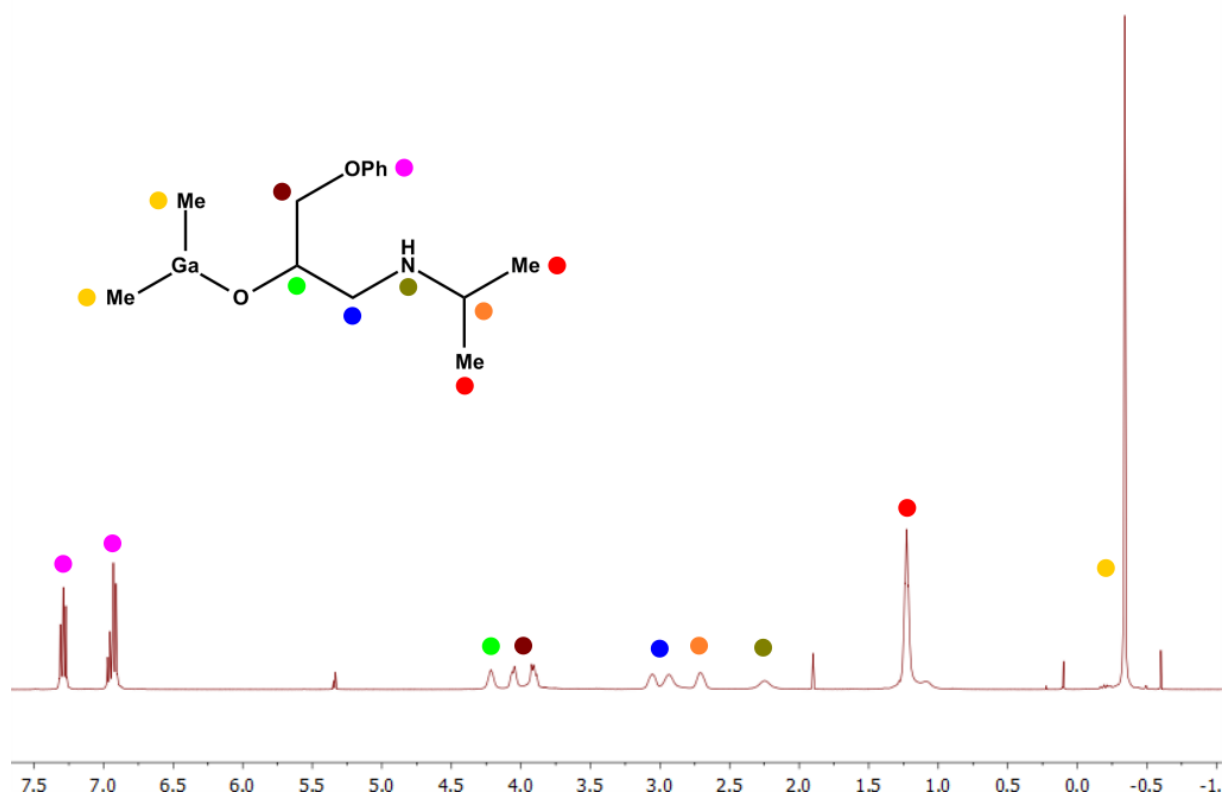

**Figure S5.** <sup>1</sup>H NMR (CD<sub>2</sub>Cl<sub>2</sub>, 400 MHz) spectrum of **3**.

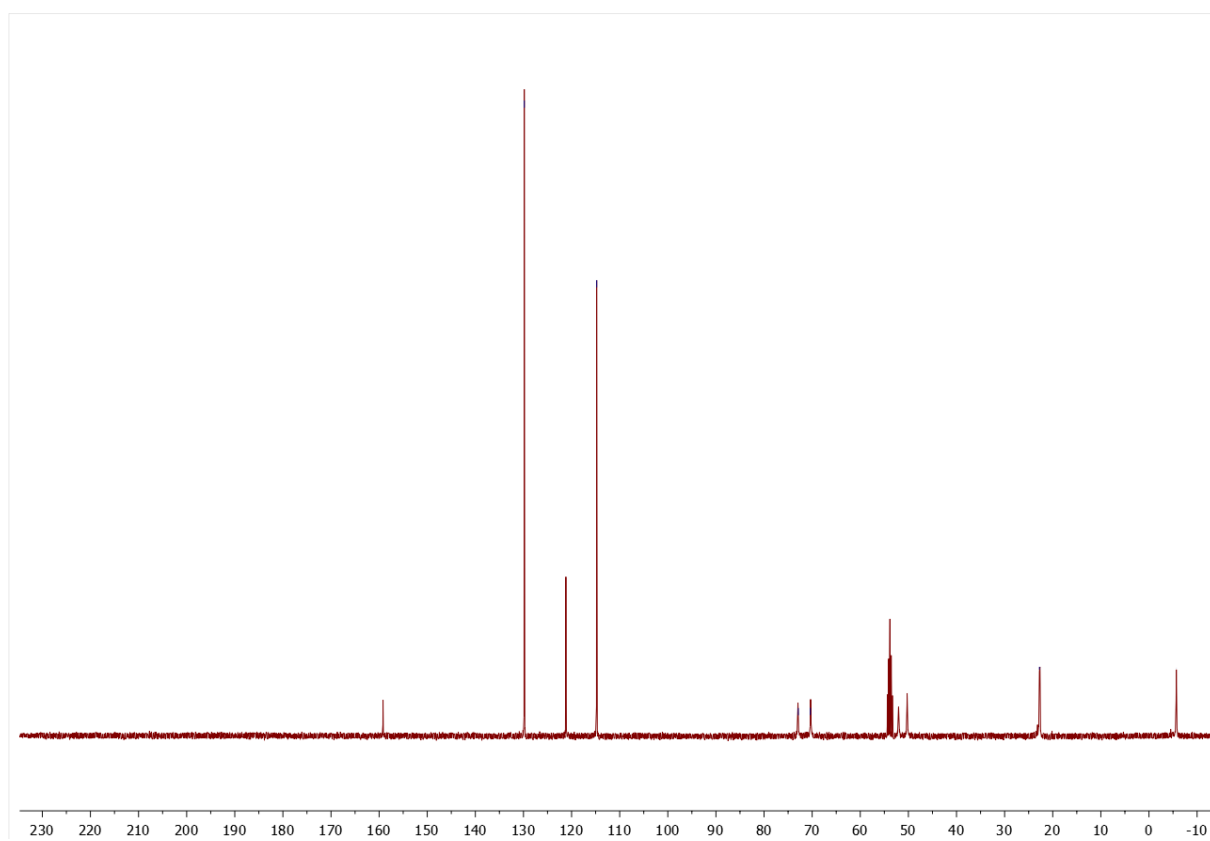

**Figure S6.**  $^{13}\text{C}$  NMR ( $\text{CD}_2\text{Cl}_2$ , 100 MHz) spectrum of **3**.

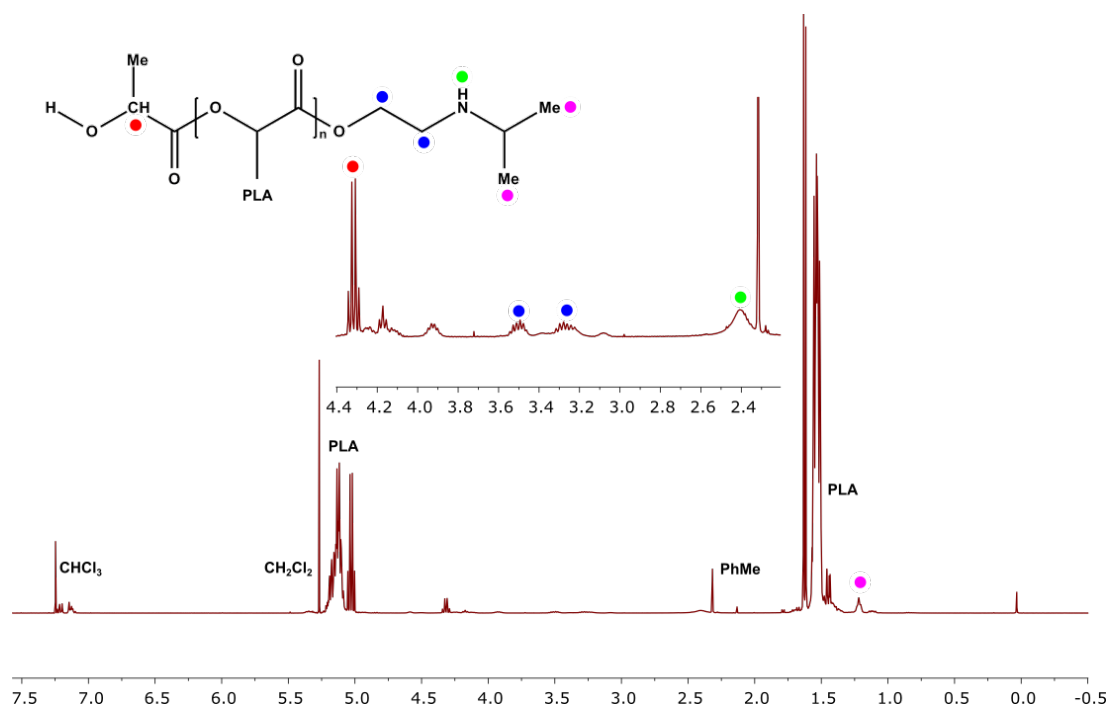

**Figure S7.**  $^1\text{H}$  NMR ( $\text{CDCl}_3$ , 400 MHz) spectra of PLA obtained by polymerization of 50 eq of *rac*-LA with **2** as an initiator, in toluene at  $70^\circ\text{C}$ , 24h.

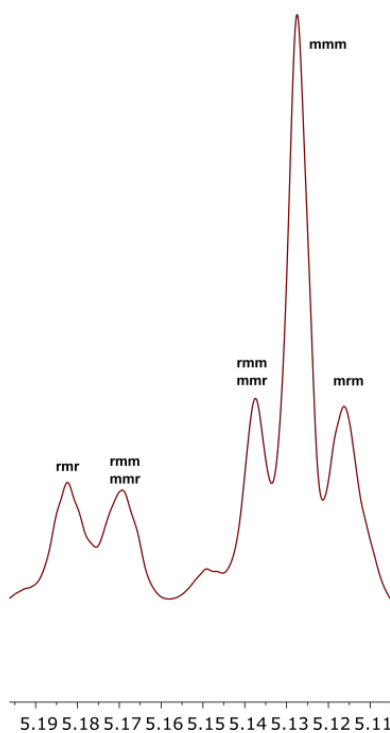

**Figure S8.** Homonuclear decoupled  $^1\text{H}$  NMR ( $\text{CDCl}_3$ , 400MHz) spectrum of the methine region of PLA obtained by polymerization of 50 eq of *rac*-LA with **2** as an initiator, in toluene at  $70^\circ\text{C}$ , 24h.

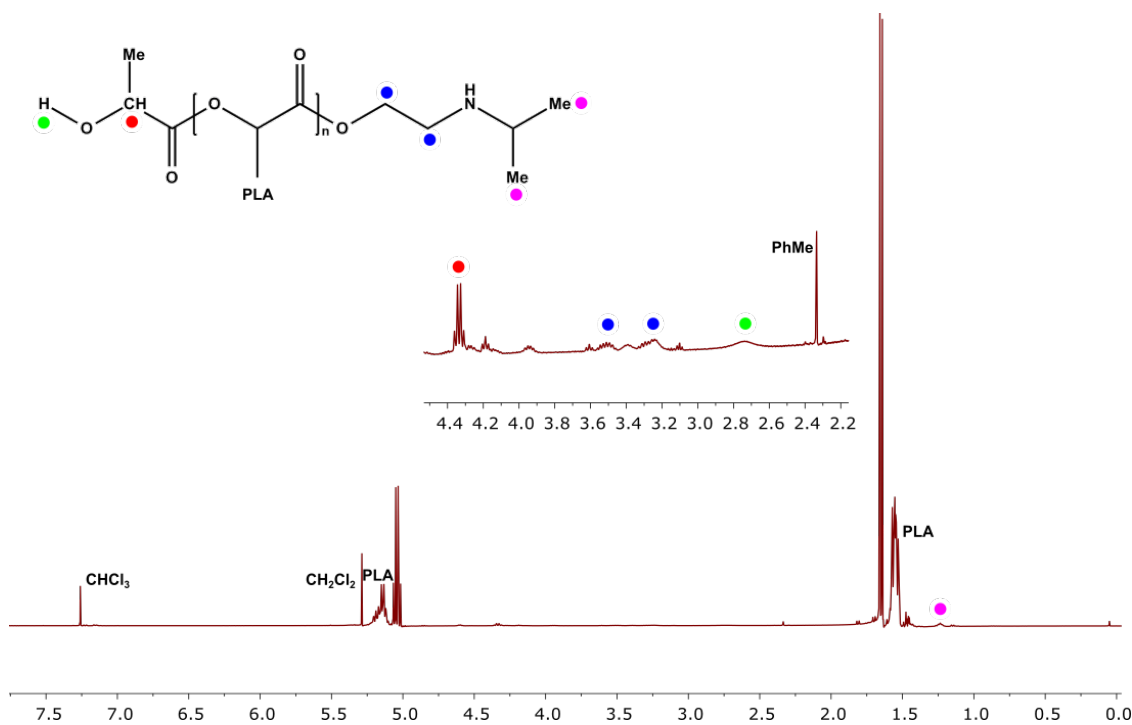

**Figure S9.**  $^1\text{H}$  NMR (CDCl<sub>3</sub>, 400 MHz) spectra of PLA obtained by polymerization of 50 eq of *rac*-LA with **2** as an initiator, in toluene at 40°C, 144h.

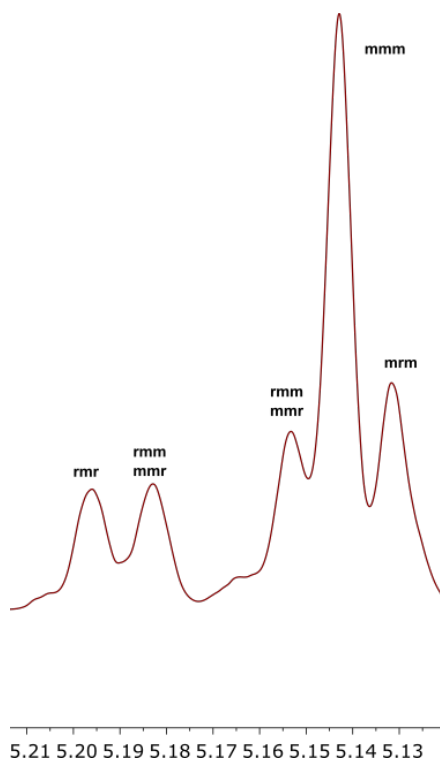

**Figure S10.** Homonuclear decoupled  $^1\text{H}$  NMR (CDCl<sub>3</sub>, 400 MHz) spectrum of the methine region of PLA obtained by polymerization of 50 eq of *rac*-LA with **2** as an initiator, in toluene at 40°C, 144h.

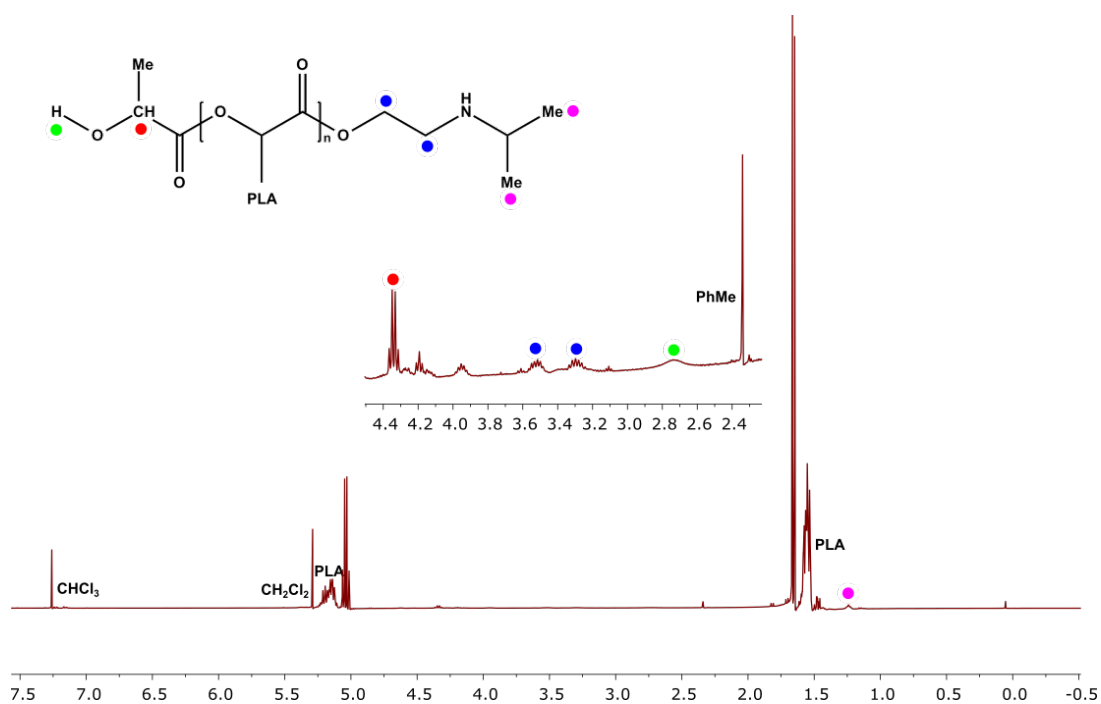

**Figure S11.**  $^1\text{H}$  NMR ( $\text{CDCl}_3$ , 400 MHz) spectra of PLA obtained by polymerization of 50 eq of *rac*-LA with **2/piridine 1:6** as an initiator, in toluene at  $40^\circ\text{C}$ , 144h.

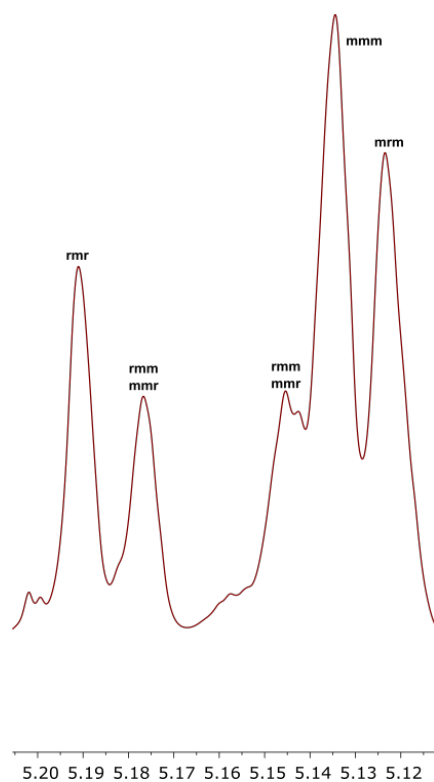

**Figure S12.** Homonuclear decoupled  $^1\text{H}$  NMR ( $\text{CDCl}_3$ , 400MHz) spectrum of the methine region of PLA obtained by polymerization of 50 eq of *rac*-LA with **2/piridine 1:6** as an initiator, in toluene at  $40^\circ\text{C}$ , 144h.



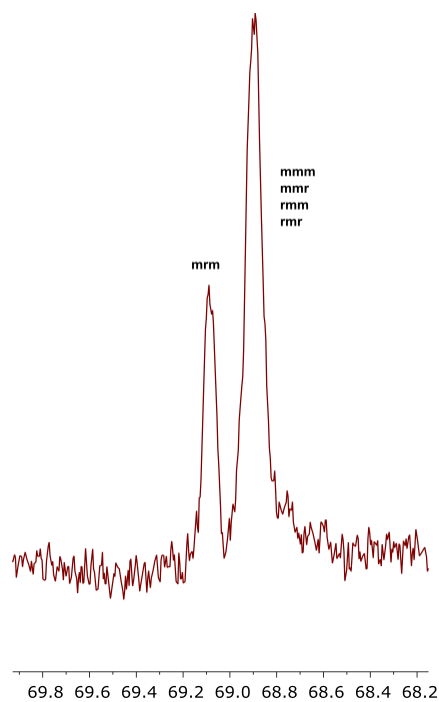

**Figure S13.**  $^{13}\text{C}$  NMR ( $\text{CDCl}_3$ , 100 MHz) spectrum of methine region of PLA obtained by polymerization of 50 eq of *rac*-LA with **2**/piridine **1**:**6** as an initiator, in toluene at  $40^\circ\text{C}$ , 144h.

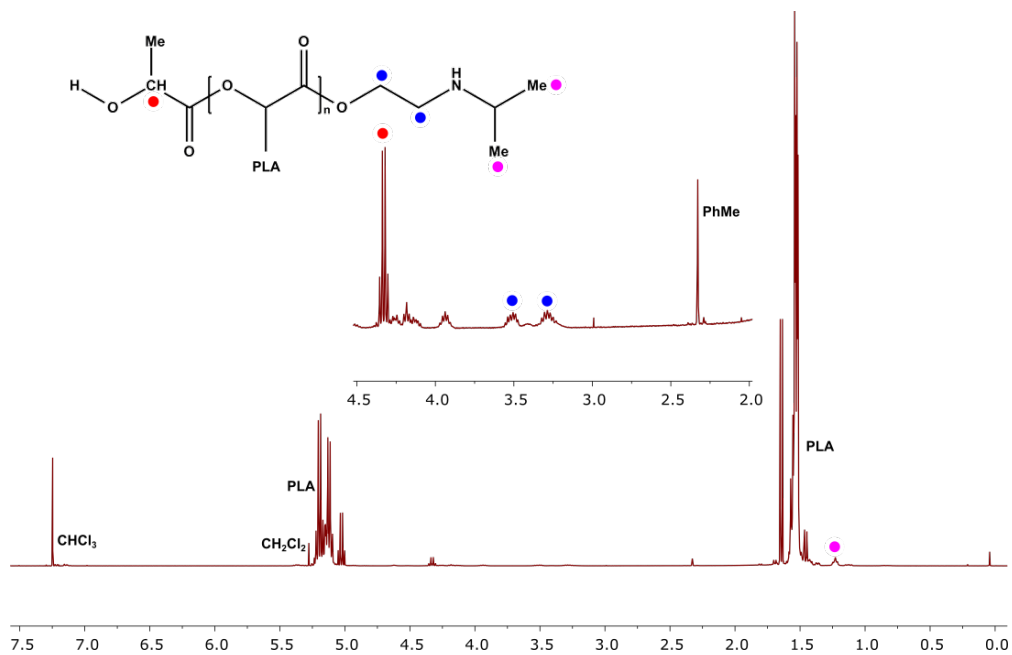

**Figure S14.**  $^1\text{H}$  NMR ( $\text{CDCl}_3$ , 400 MHz) spectra of PLA obtained by polymerization of 50 eq of *rac*-LA with **2**/DMAP **1**:**6** as an initiator, in toluene at  $40^\circ\text{C}$ , 120h.

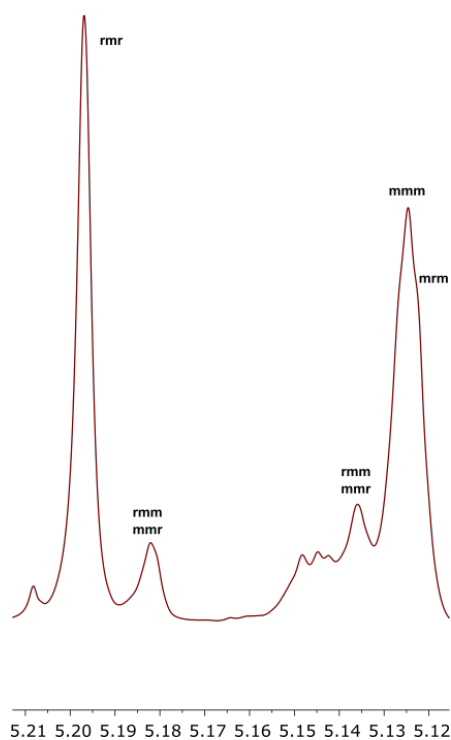

**Figure S15.** Homonuclear decoupled  $^1\text{H}$  NMR ( $\text{CDCl}_3$ , 400MHz) spectrum of the methine region of PLA obtained by polymerization of 50 eq of *rac*-LA with **2/DMAP 1:6** as an initiator, in toluene at 40°C, 120h.

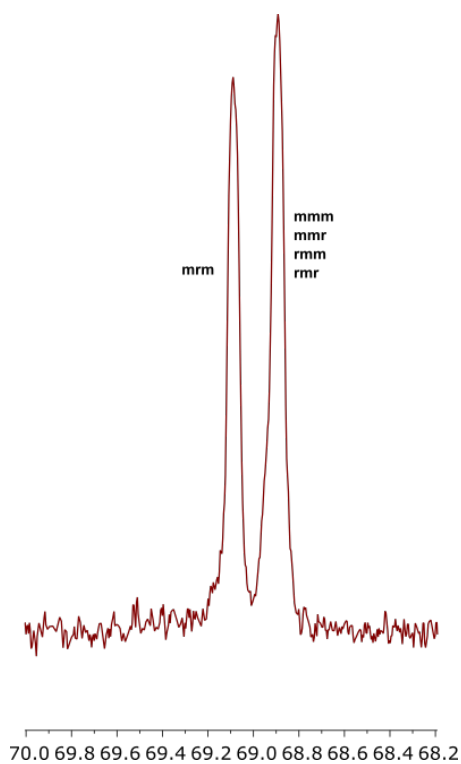

**Figure S16.**  $^{13}\text{C}$  NMR ( $\text{CDCl}_3$ , 100 MHz) spectrum of methine region of PLA obtained by polymerization of 50 eq of *rac*-LA with **2/DMAP 1:6** as an initiator, in toluene at 40°C, 120h.

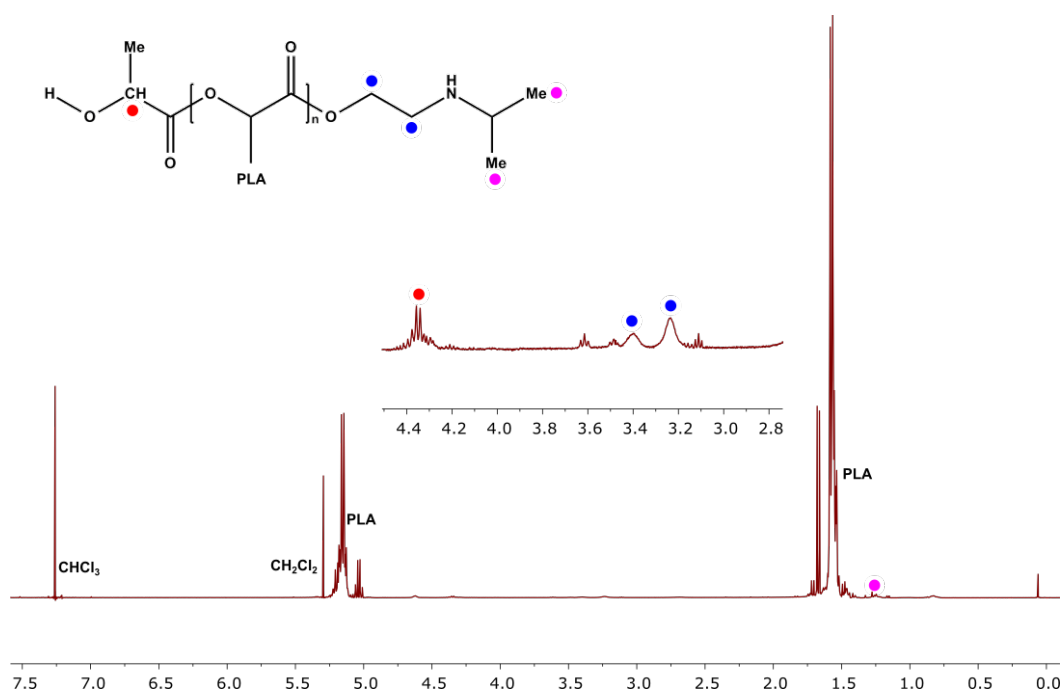

**Figure S17.**  $^1\text{H}$  NMR ( $\text{CDCl}_3$ , 400 MHz) spectra of PLA obtained by polymerization of 50 eq of *rac*-LA with **2/DBU 1:2** as an initiator, in methylene chloride at  $-20^\circ\text{C}$ , 18h.

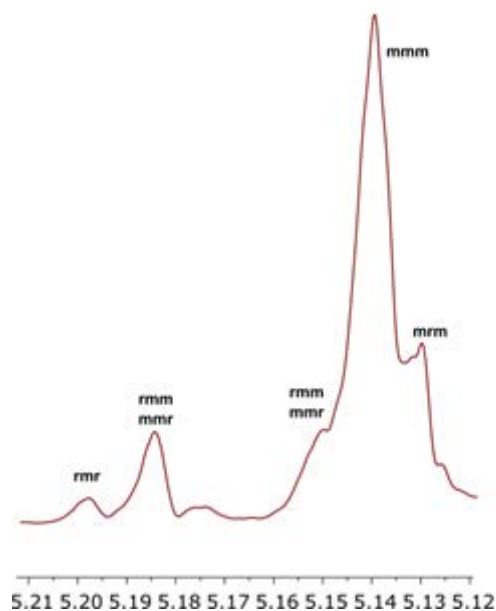

**Figure S18.** Homonuclear decoupled  $^1\text{H}$  NMR ( $\text{CDCl}_3$ , 400MHz) spectrum of the methine region of PLA obtained by polymerization of 50 eq of *rac*-LA with **2/DBU 1:2** as an initiator, in methylene chloride at  $-20^\circ\text{C}$ , 18h.

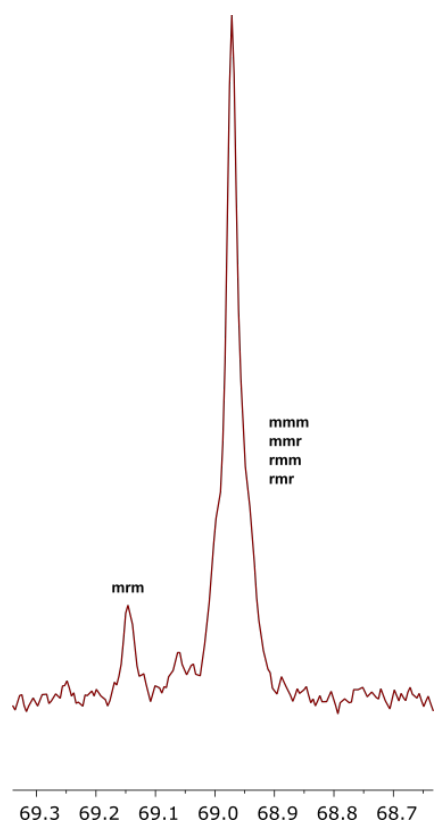

**Figure S19.**  $^{13}\text{C}$  NMR ( $\text{CDCl}_3$ , 100 MHz) spectrum of methine region of PLA obtained by polymerization of 50 eq of *rac*-LA with **2/DBU 1:2** as an initiator, in methylene chloride at  $-20^\circ\text{C}$ , 18h.

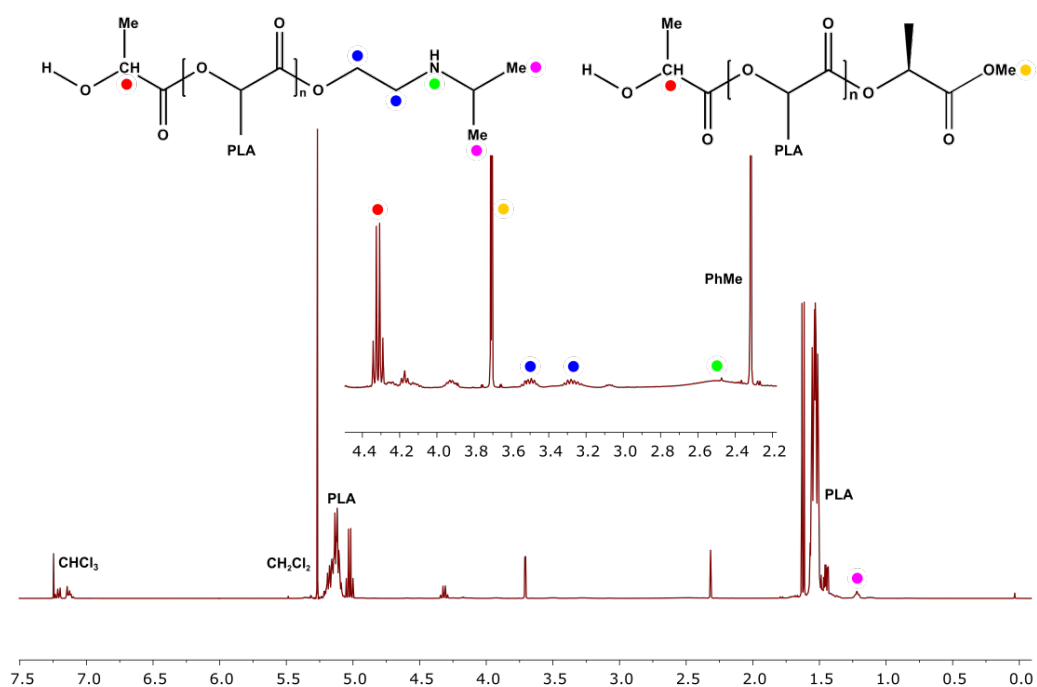

**Figure S20.**  $^1\text{H}$  NMR ( $\text{CDCl}_3$ , 400 MHz) spectra of PLA obtained by polymerization of 50 eq of *rac*-LA with  $\text{Me}_2\text{Ga}(\mu\text{-OCH}(\text{Me})\text{CO}_2\text{Me})_2/2$  H-B as an initiator, in toluene at  $70^\circ\text{C}$ , 24h.

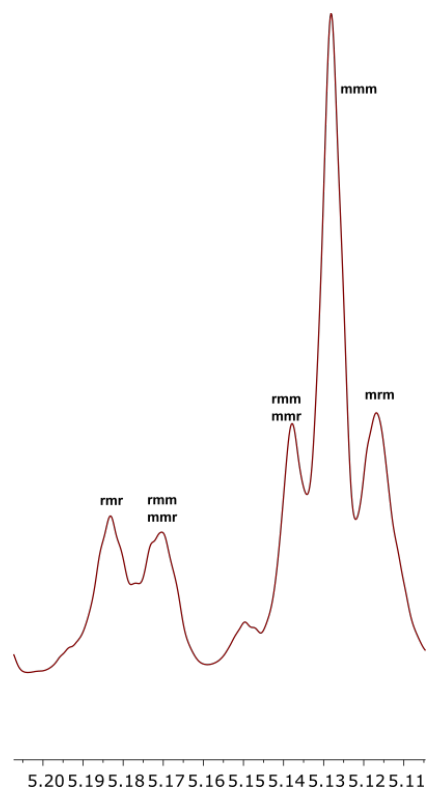

**Figure S21.** Homonuclear decoupled  $^1\text{H}$  NMR ( $\text{CDCl}_3$ , 400MHz) spectrum of the methine region of PLA obtained by polymerization of 50 eq of *rac*-LA with  $\text{Me}_2\text{Ga}(\mu\text{-OCH}(\text{Me})\text{CO}_2\text{Me})_2/\text{H-B}$  as an initiator, in toluene at  $70^\circ\text{C}$ , 24h.

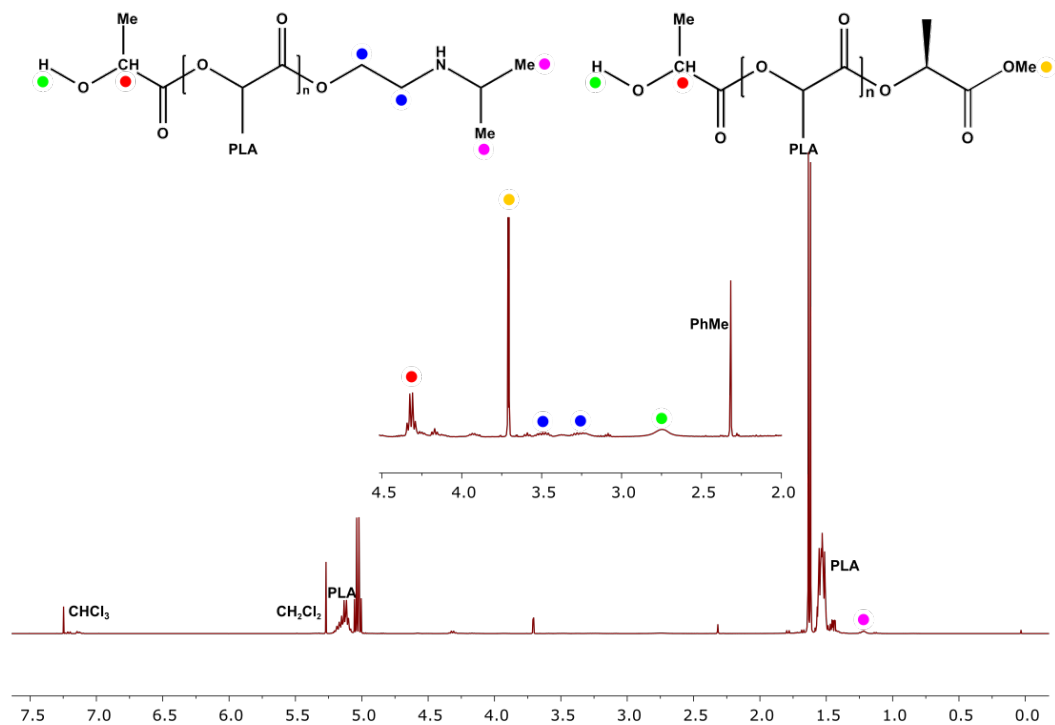

**Figure S22.**  $^1\text{H}$  NMR ( $\text{CDCl}_3$ , 400 MHz) spectra of PLA obtained by polymerization of 50 eq of *rac*-LA with  $\text{Me}_2\text{Ga}(\mu\text{-OCH}(\text{Me})\text{CO}_2\text{Me})_2/2$  H-B as an initiator, in toluene at  $40^\circ\text{C}$ , 144h.

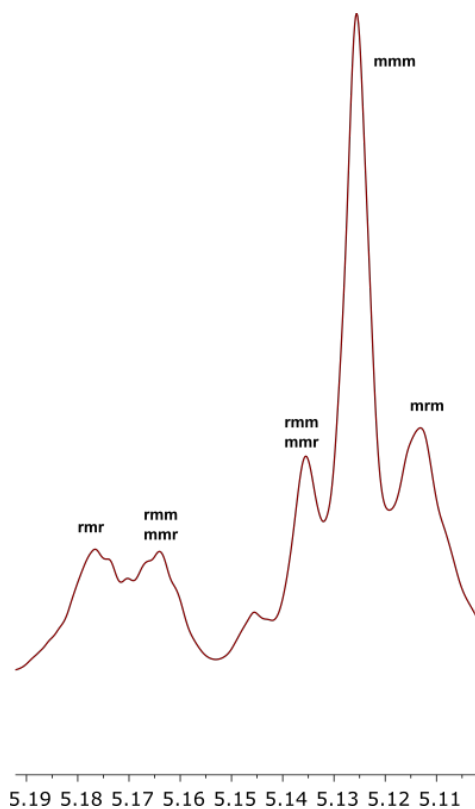

**Figure S23.** Homonuclear decoupled  $^1\text{H}$  NMR ( $\text{CDCl}_3$ , 400MHz) spectrum of the methine region of PLA obtained by polymerization of 50 eq of *rac*-LA with  $\text{Me}_2\text{Ga}(\mu\text{-OCH}(\text{Me})\text{CO}_2\text{Me})_2/2$  H-B as an initiator, in toluene at  $40^\circ\text{C}$ , 144h.

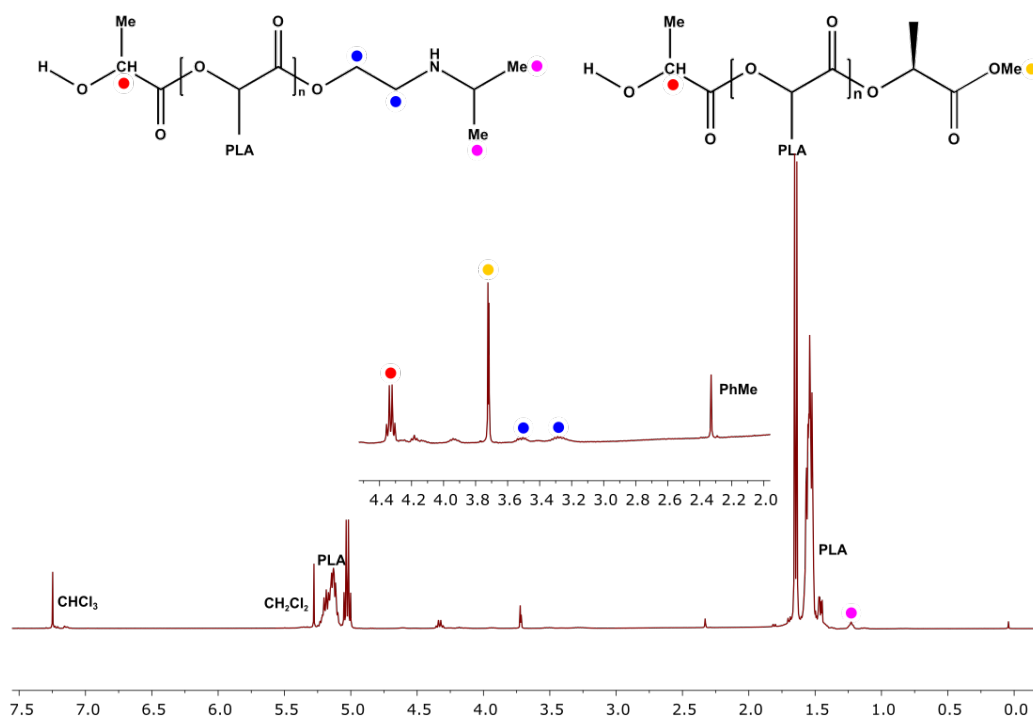

**Figure S24.**  $^1\text{H}$  NMR ( $\text{CDCl}_3$ , 400 MHz) spectra of PLA obtained by polymerization of 50 eq of *rac*-LA with  $\text{Me}_2\text{Ga}(\mu\text{-OCH}(\text{Me})\text{CO}_2\text{Me})_2/2$  H-B/piridine 1:6 as an initiator, in toluene at  $40^\circ\text{C}$ , 144h.

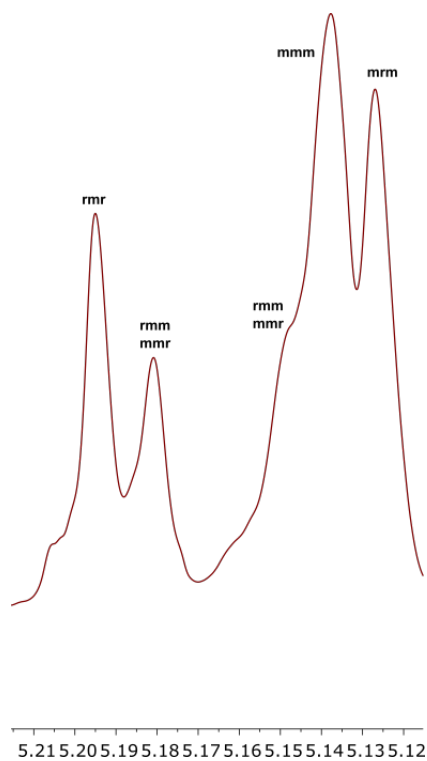

**Figure S25.** Homonuclear decoupled  $^1\text{H}$  NMR ( $\text{CDCl}_3$ , 400MHz) spectrum of the methine region of PLA obtained by polymerization of 50 eq of *rac*-LA with  $\text{Me}_2\text{Ga}(\mu\text{-OCH}(\text{Me})\text{CO}_2\text{Me})_2/2$  H-B/piridine 1:6 as an initiator, in toluene at  $40^\circ\text{C}$ , 144h.

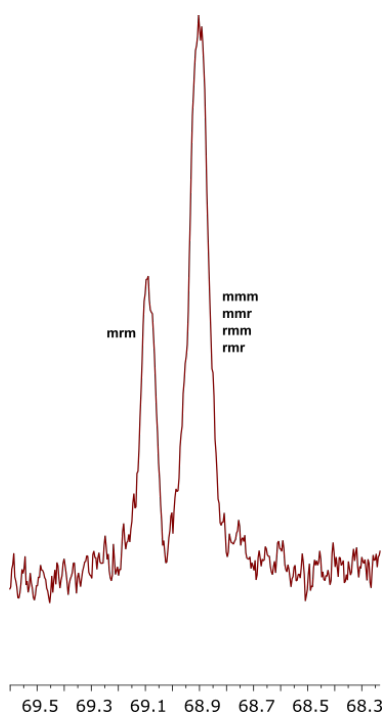

**Figure S26.**  $^{13}\text{C}$  NMR ( $\text{CDCl}_3$ , 100 MHz) spectrum of methine region of PLA obtained by polymerization of 50 eq of *rac*-LA with  $\text{Me}_2\text{Ga}(\mu\text{-OCH}(\text{Me})\text{CO}_2\text{Me})_2/2$  H-B/piridine 1:6 as an initiator, in toluene at  $40^\circ\text{C}$ , 144h.

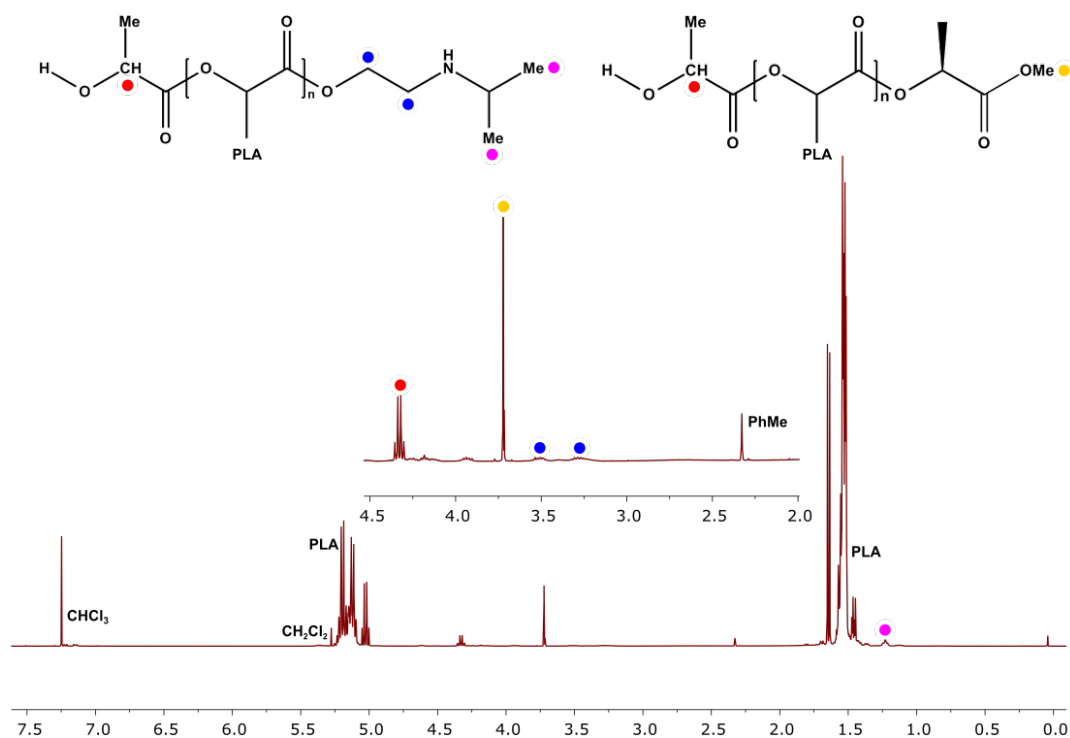

**Figure S27.**  $^1\text{H}$  NMR ( $\text{CDCl}_3$ , 400 MHz) spectra of PLA obtained by polymerization of 50 eq of *rac*-LA with  $\text{Me}_2\text{Ga}(\mu\text{-OCH}(\text{Me})\text{CO}_2\text{Me})_2/2$  H-B/DMAP 1:6 as an initiator, in toluene at  $40^\circ\text{C}$ , 120h.



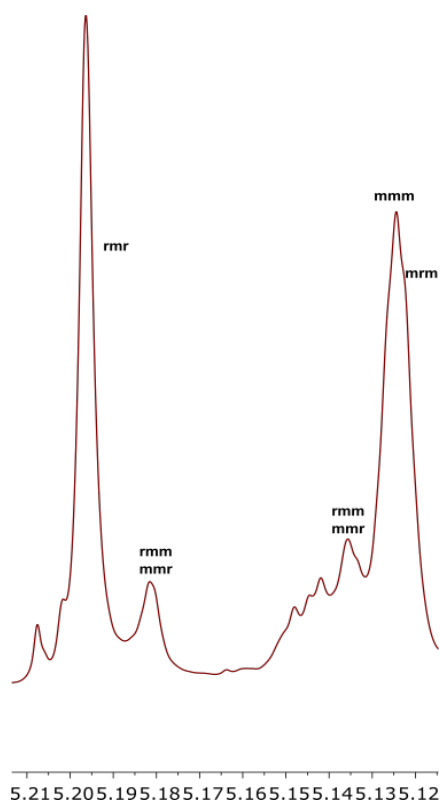

**Figure S28.** Homonuclear decoupled  $^1\text{H}$  NMR ( $\text{CDCl}_3$ , 400MHz) spectrum of the methine region of PLA obtained by polymerization of 50 eq of *rac*-LA with  $\text{Me}_2\text{Ga}(\mu\text{-OCH}(\text{Me})\text{CO}_2\text{Me})_2/2$  H-B/DMAP 1:6 as an initiator, in toluene at  $40^\circ\text{C}$ , 120h.

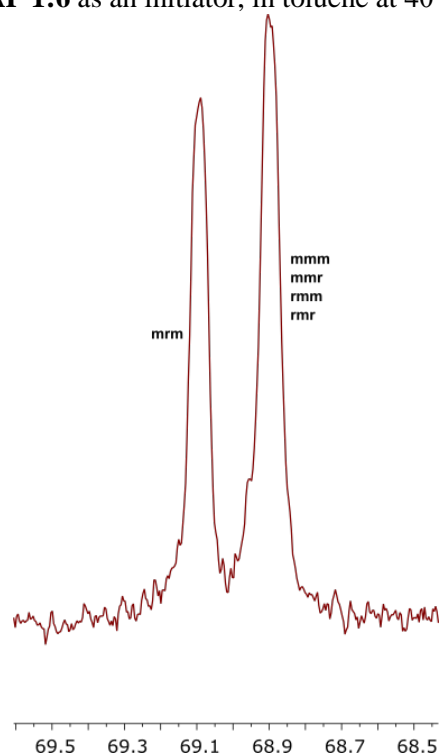

**Figure S29.**  $^{13}\text{C}$  NMR ( $\text{CDCl}_3$ , 100 MHz) spectrum of methine region of PLA obtained by polymerization of 50 eq of *rac*-LA with  $\text{Me}_2\text{Ga}(\mu\text{-OCH}(\text{Me})\text{CO}_2\text{Me})_2/2$  H-B/DMAP 1:6 as an initiator, in toluene at  $40^\circ\text{C}$ , 120h.

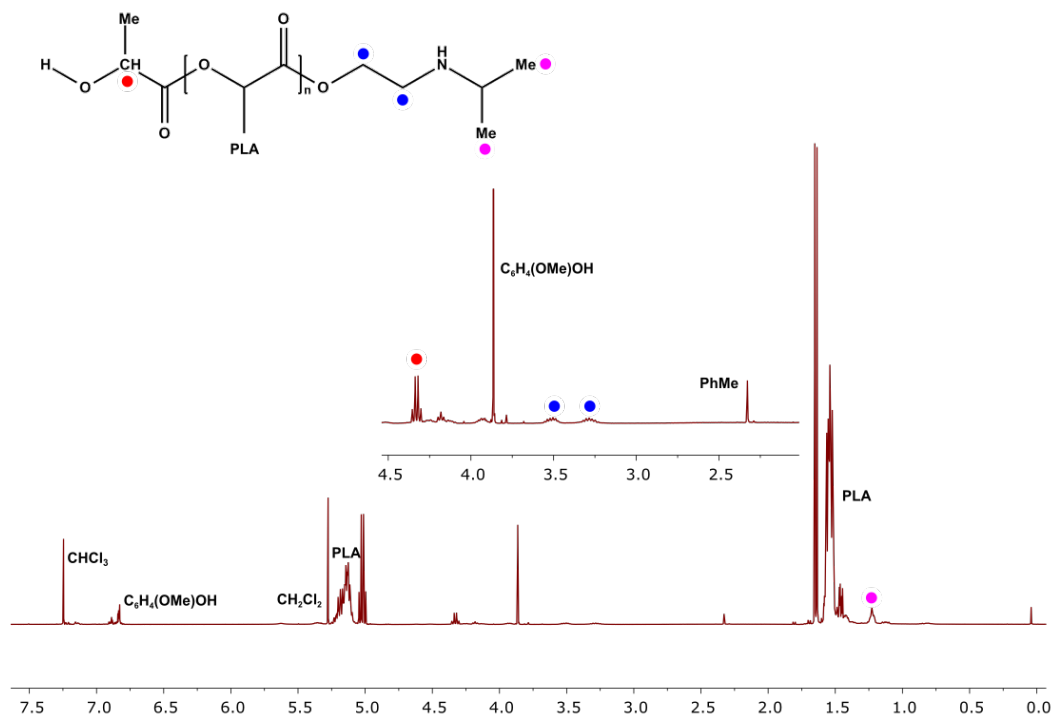

**Figure S30.** <sup>1</sup>H NMR (CDCl<sub>3</sub>, 400 MHz) spectra of PLA obtained by polymerization of 25 eq of *rac*-LA with [Me<sub>2</sub>Ga(μ-OC<sub>6</sub>H<sub>4</sub>OMe)]<sub>2</sub>/2 H-B as an initiator, in toluene at 70°C, 24h.

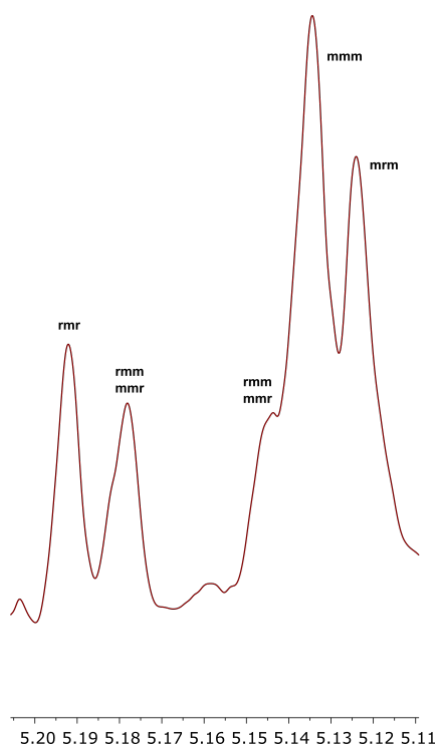

**Figure S31.** Homonuclear decoupled  $^1\text{H}$  NMR ( $\text{CDCl}_3$ , 400MHz) spectrum of the methine region of PLA obtained by polymerization of 25 eq of *rac*-LA with  $[\text{Me}_2\text{Ga}(\mu\text{-OC}_6\text{H}_4\text{OMe})]_2/\text{H-B}$  as an initiator, in toluene at  $70^\circ\text{C}$ , 24h

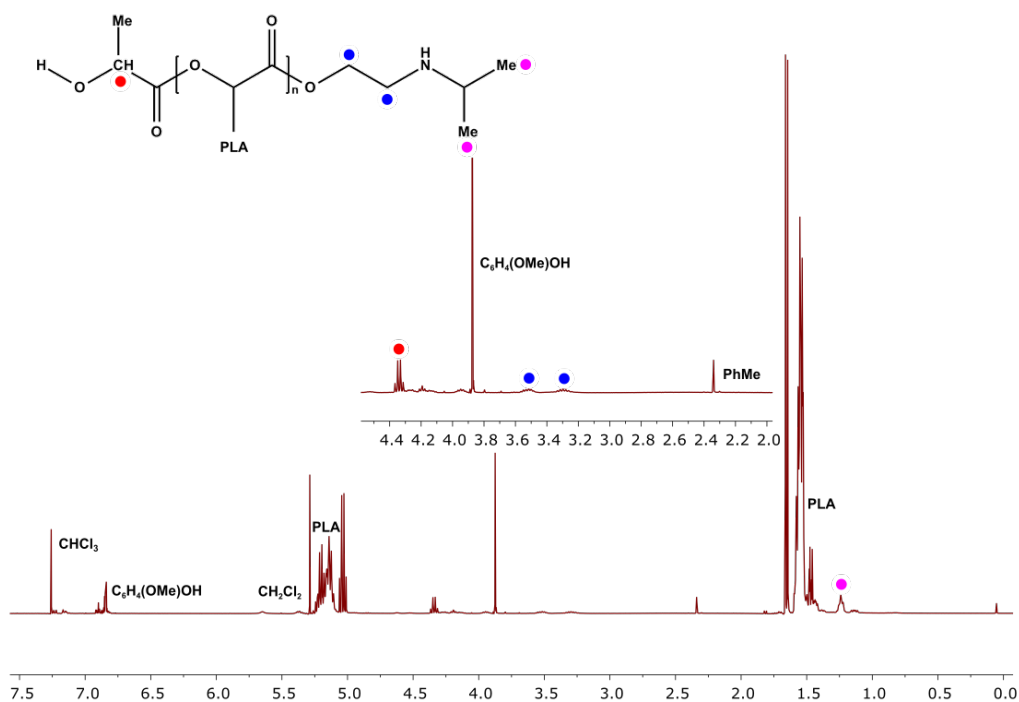

**Figure S32.**  $^1\text{H}$  NMR ( $\text{CDCl}_3$ , 400 MHz) spectra of PLA obtained by polymerization of 25 eq of *rac*-LA with  $[\text{Me}_2\text{Ga}(\mu\text{-OC}_6\text{H}_4\text{OMe})]_2/\text{H-B}/\gamma\text{-picoline 1:6}$  as an initiator, in toluene at  $40^\circ\text{C}$ , 144h.

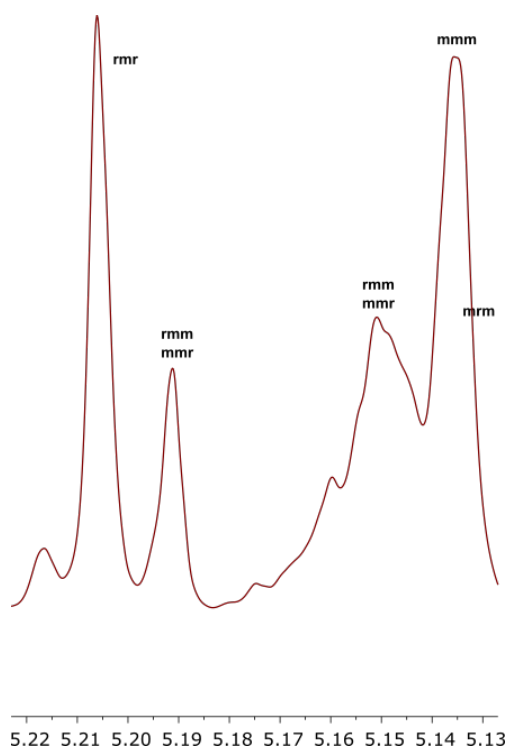

**Figure S33.** Homonuclear decoupled  $^1\text{H}$  NMR ( $\text{CDCl}_3$ , 400MHz) spectrum of the methine region of PLA obtained by polymerization of 25 eq of *rac*-LA with  $[\text{Me}_2\text{Ga}(\mu\text{-OC}_6\text{H}_4\text{OMe})]_2/2$  H-B/ $\gamma$ -picoline **1:6** as an initiator, in toluene at 40°C, 144h.

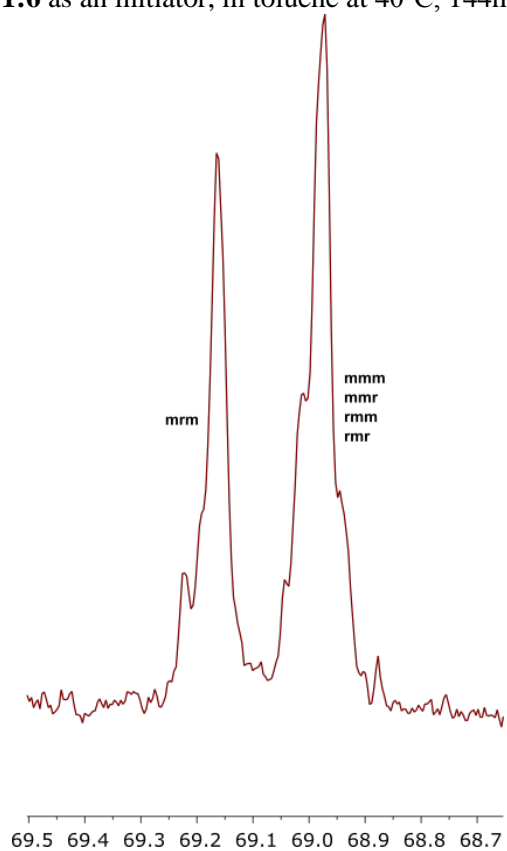

**Figure S34.**  $^{13}\text{C}$  NMR ( $\text{CDCl}_3$ , 100 MHz) spectrum of methine region of PLA obtained by polymerization of 25 eq of *rac*-LA with  $[\text{Me}_2\text{Ga}(\mu\text{-OC}_6\text{H}_4\text{OMe})]_2/2$  H-B/ $\gamma$ -picoline **1:6** as an initiator, in toluene at 40°C, 144h.

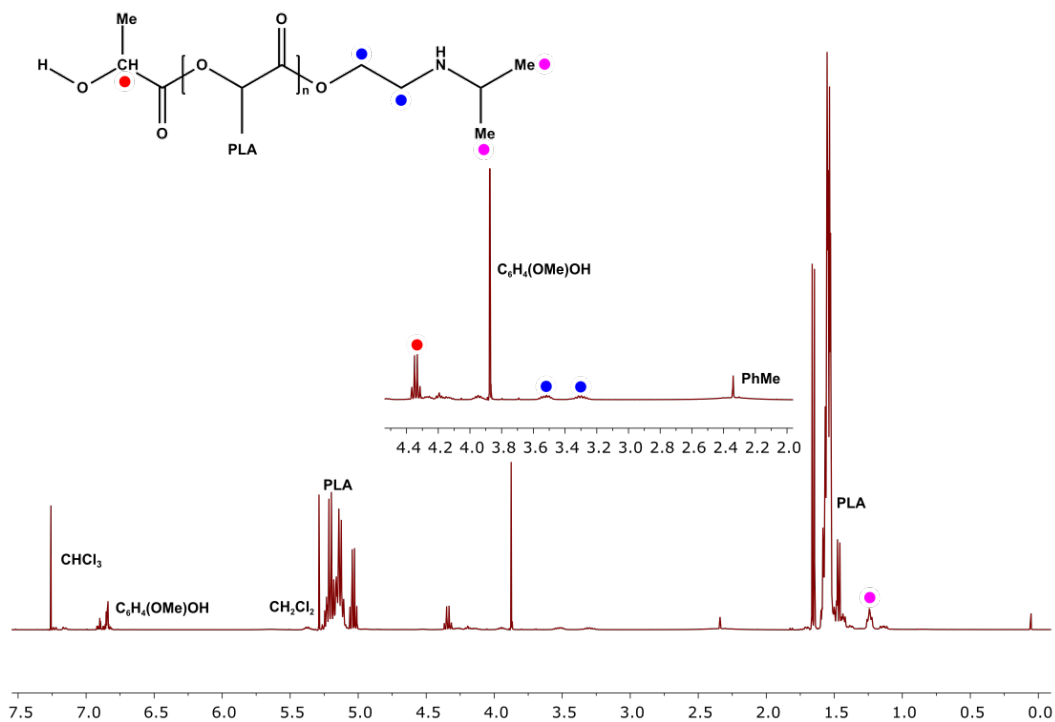

**Figure S35.**  $^1\text{H}$  NMR ( $\text{CDCl}_3$ , 400 MHz) spectra of PLA obtained by polymerization of 25 eq of *rac*-LA with  $[\text{Me}_2\text{Ga}(\mu\text{-OC}_6\text{H}_4\text{OMe})]_2/2$  H-B/ $\gamma$ -picoline **1:60** as an initiator, in toluene at  $40^\circ\text{C}$ , 144h.

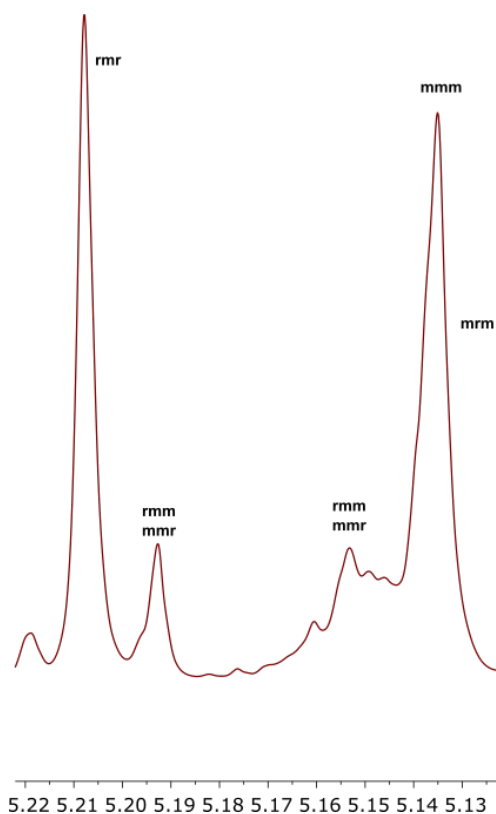

**Figure S36.** Homonuclear decoupled  $^1\text{H}$  NMR ( $\text{CDCl}_3$ , 400MHz) spectrum of the methine region of PLA obtained by polymerization of 25 eq of *rac*-LA with  $[\text{Me}_2\text{Ga}(\mu\text{-OC}_6\text{H}_4\text{OMe})]_2/2$  H-B/ $\gamma$ -picoline **1:60** as an initiator, in toluene at  $40^\circ\text{C}$ , 144h.

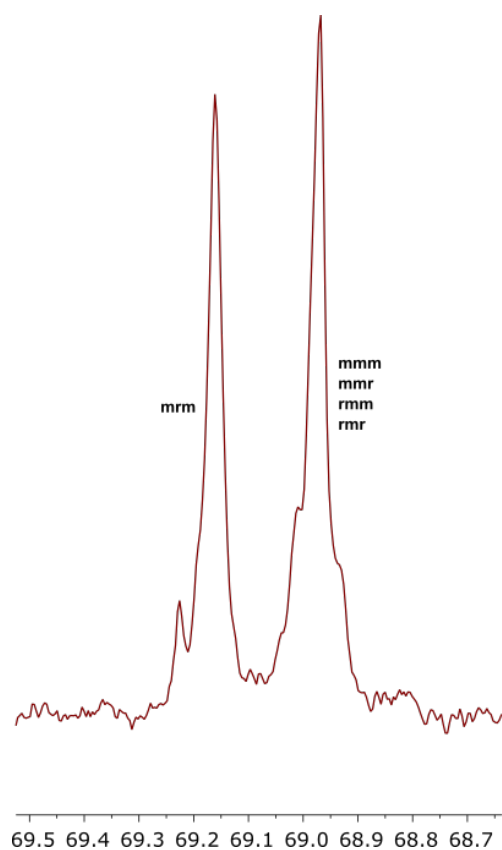

**Figure S37.**  $^{13}\text{C}$  NMR ( $\text{CDCl}_3$ , 100 MHz) spectrum of methine region of PLA obtained by polymerization of 25 eq of *rac*-LA with  $[\text{Me}_2\text{Ga}(\mu\text{-OC}_6\text{H}_4\text{OMe})_2]/2$  H-B/ $\gamma$ -picoline **1:60** as an initiator, in toluene at  $40^\circ\text{C}$ , 144h.

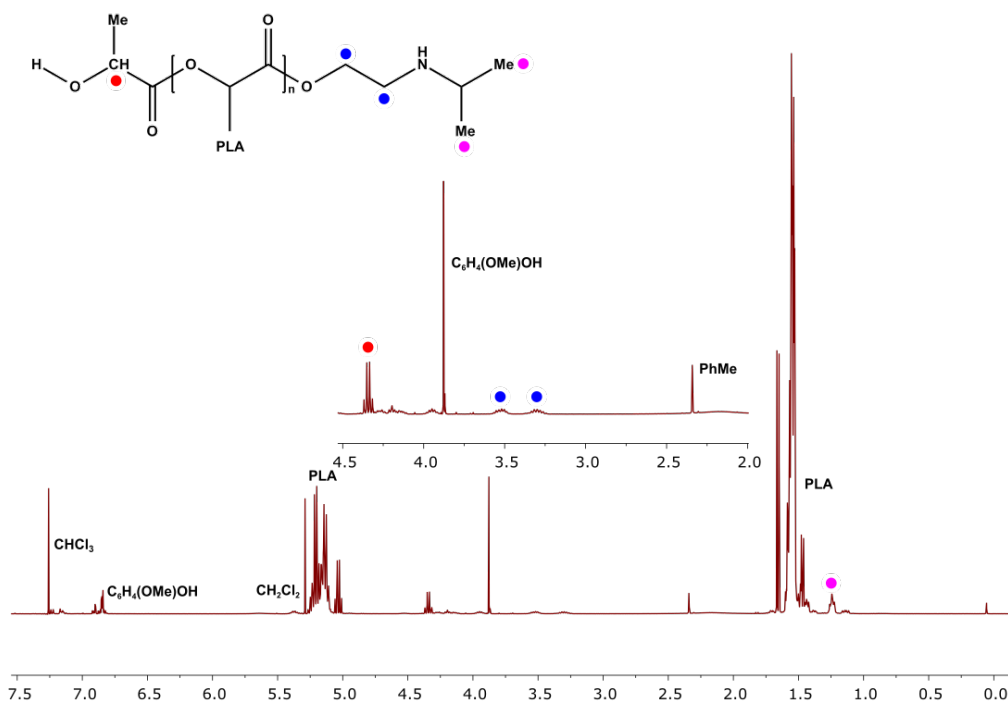

**Figure S38.**  $^1\text{H}$  NMR ( $\text{CDCl}_3$ , 400 MHz) spectra of PLA obtained by polymerization of 25 eq of *rac*-LA with  $[\text{Me}_2\text{Ga}(\mu\text{-OC}_6\text{H}_4\text{OMe})_2]/2$  H-B/*pyridine* **1:60** as an initiator, in toluene at  $40^\circ\text{C}$ , 144h.

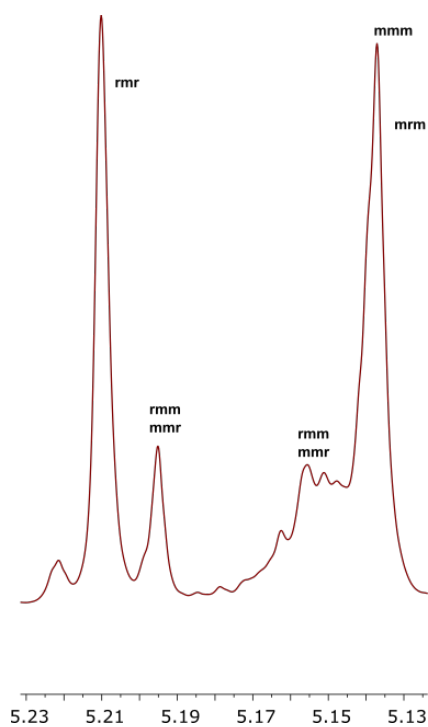

**Figure S39.** Homonuclear decoupled  $^1\text{H}$  NMR ( $\text{CDCl}_3$ , 400MHz) spectrum of the methine region of PLA obtained by polymerization of 25 eq of *rac*-LA with  $[\text{Me}_2\text{Ga}(\mu\text{-OC}_6\text{H}_4\text{OMe})]_2/2$  H-B/piridine **1:60** as an initiator, in toluene at 40°C, 144h.

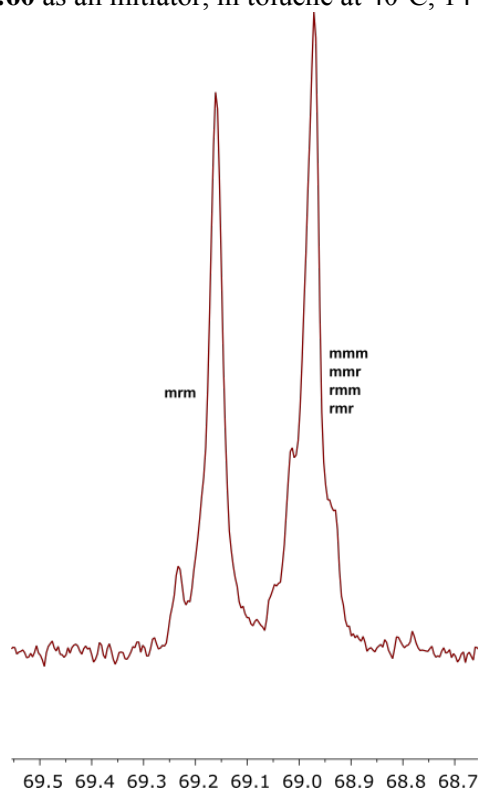

**Figure S40.**  $^{13}\text{C}$  NMR ( $\text{CDCl}_3$ , 100 MHz) spectrum of methine region of PLA obtained by polymerization of 25 eq of *rac*-LA with  $[\text{Me}_2\text{Ga}(\mu\text{-OC}_6\text{H}_4\text{OMe})]_2/2$  H-B/piridine **1:60** as an initiator, in toluene at 40°C, 144h.

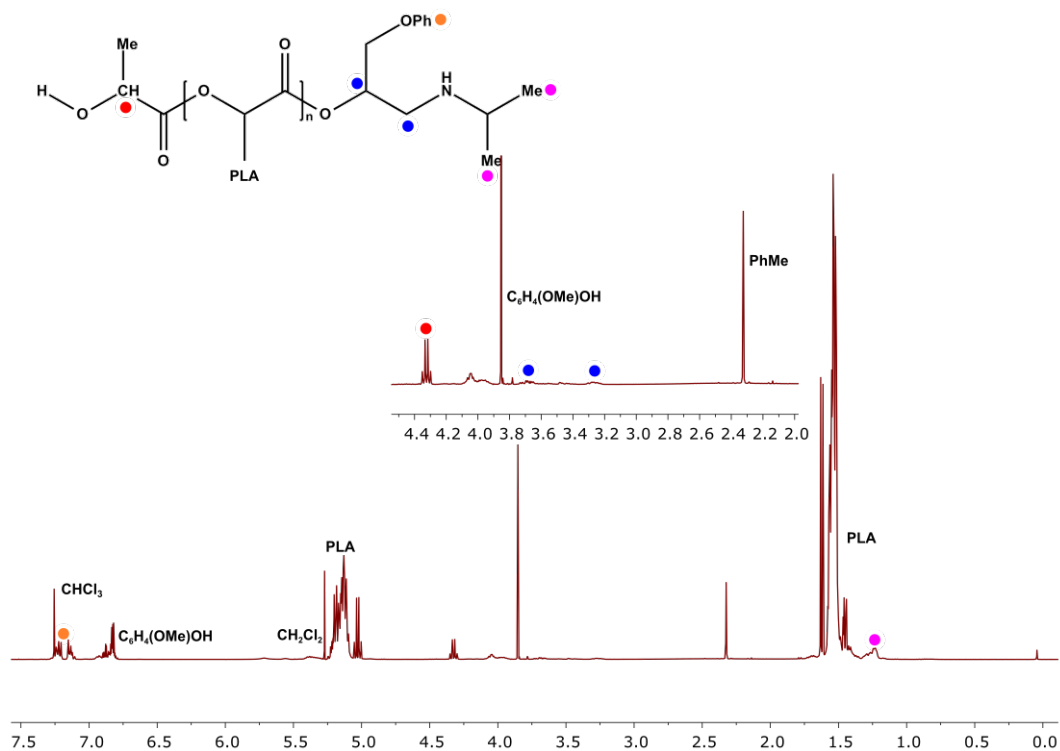

**Figure S41.**  $^1\text{H}$  NMR ( $\text{CDCl}_3$ , 400 MHz) spectra of PLA obtained by polymerization of 25 eq of *rac*-LA with  $[\text{Me}_2\text{Ga}(\mu\text{-OC}_6\text{H}_4\text{OMe})_2/2 \text{H-C}]$  as an initiator, in toluene at  $40^\circ\text{C}$ , 240h.

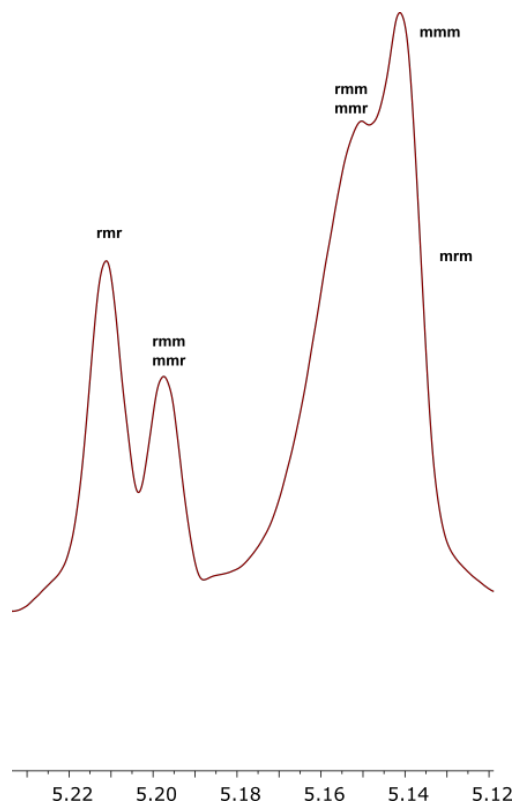

**Figure S42.** Homonuclear decoupled  $^1\text{H}$  NMR ( $\text{CDCl}_3$ , 400MHz) spectrum of the methine region of PLA obtained by polymerization of 25 eq of *rac*-LA with  $[\text{Me}_2\text{Ga}(\mu\text{-OC}_6\text{H}_4\text{OMe})_2/2 \text{H-C}]$  as an initiator, in toluene at  $40^\circ\text{C}$ , 240h.



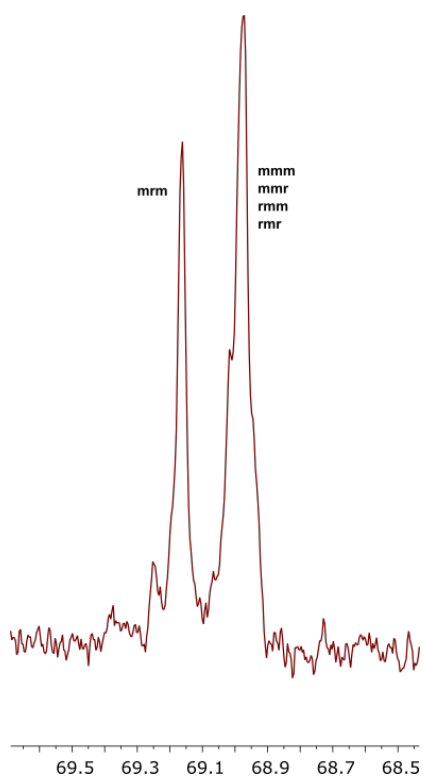

**Figure S43.**  $^{13}\text{C}$  NMR ( $\text{CDCl}_3$ , 100 MHz) spectrum of methine region of PLA obtained by polymerization of 25 eq of *rac*-LA with  $[\text{Me}_2\text{Ga}(\mu\text{-OC}_6\text{H}_4\text{OMe})]_2/\text{H-C}$  as an initiator, in toluene at  $40^\circ\text{C}$ , 240h.

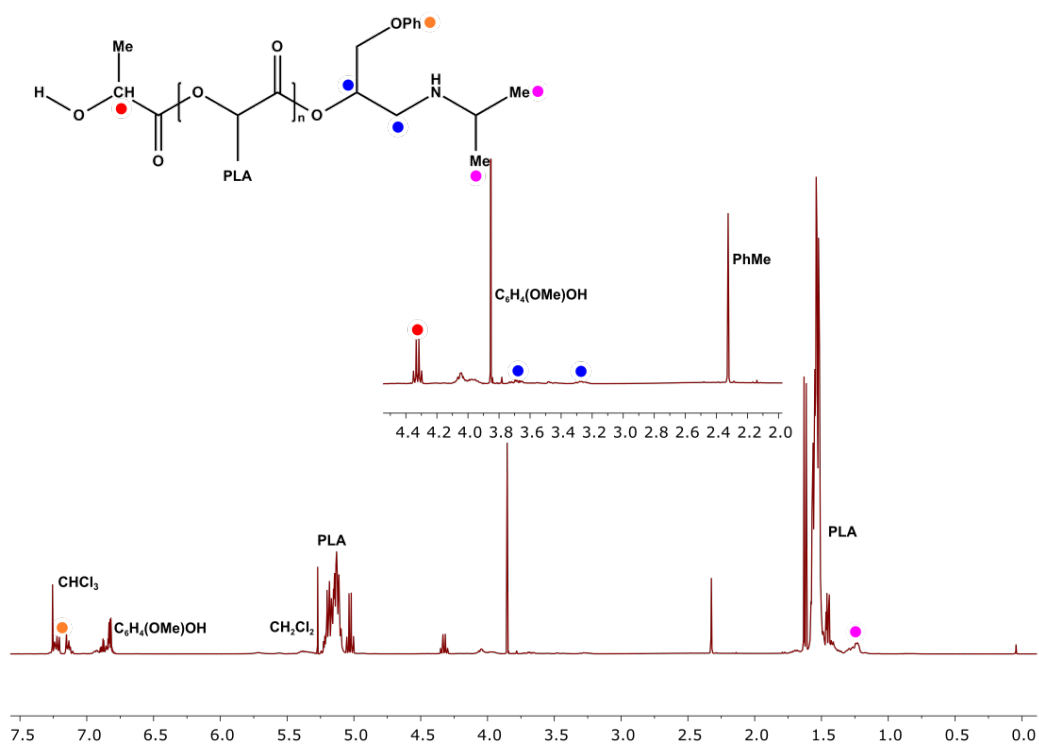

**Figure S44.**  $^1\text{H}$  NMR ( $\text{CDCl}_3$ , 400 MHz) spectra of PLA obtained by polymerization of 25 eq of *rac*-LA with  $[\text{Me}_2\text{Ga}(\mu\text{-OC}_6\text{H}_4\text{OMe})]_2/\text{H-C}/\text{pyridine 1:6}$  as an initiator, in toluene at  $40^\circ\text{C}$ , 240h.

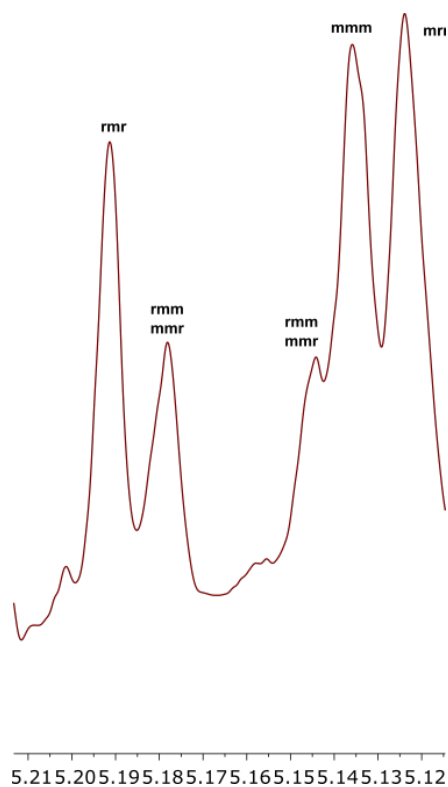

**Figure S45.** Homonuclear decoupled  $^1\text{H}$  NMR ( $\text{CDCl}_3$ , 400MHz) spectrum of the methine region of PLA obtained by polymerization of 25 eq of *rac*-LA with  $[\text{Me}_2\text{Ga}(\mu\text{-OC}_6\text{H}_4\text{OMe})_2/2 \text{H-C/piridine } 1:6$  as an initiator, in toluene at  $40^\circ\text{C}$ , 240h.

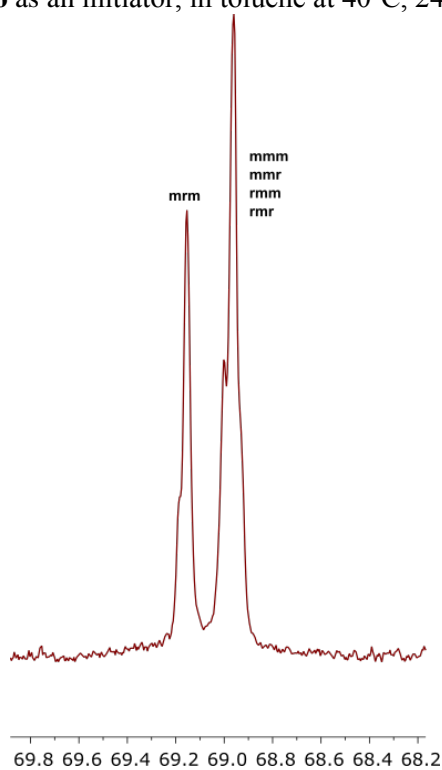

**Figure S46.**  $^{13}\text{C}$  NMR ( $\text{CDCl}_3$ , 100 MHz) spectrum of methine region of PLA obtained by polymerization of 25 eq of *rac*-LA with  $[\text{Me}_2\text{Ga}(\mu\text{-OC}_6\text{H}_4\text{OMe})_2/2 \text{H-C/piridine } 1:6$  as an initiator, in toluene at  $40^\circ\text{C}$ , 240h.

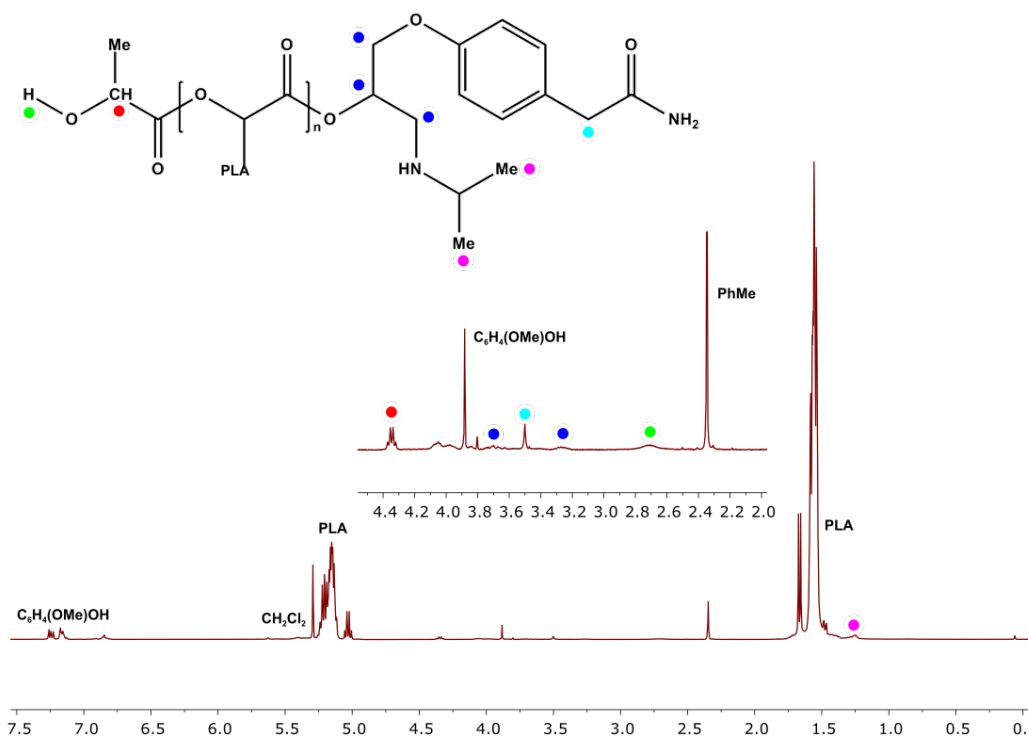

**Figure S47.**  $^1\text{H}$  NMR ( $\text{CDCl}_3$ , 400 MHz) spectra of PLA obtained by polymerization of 100 eq of *rac*-LA with  $[\text{Me}_2\text{Ga}(\mu\text{-OC}_6\text{H}_4\text{OMe})]_2/2$  atenolol as an initiator, in toluene at  $40^\circ\text{C}$ , 720h.

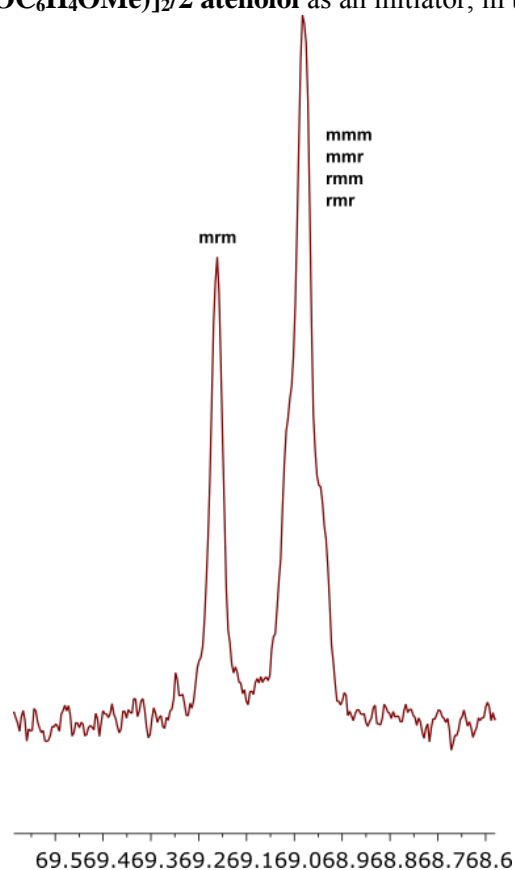

**Figure S48.**  $^{13}\text{C}$  NMR ( $\text{CDCl}_3$ , 100 MHz) spectrum of methine region of PLA obtained by polymerization of 100 eq of *rac*-LA with  $[\text{Me}_2\text{Ga}(\mu\text{-OC}_6\text{H}_4\text{OMe})]_2/2$  atenolol as an initiator, in toluene at  $40^\circ\text{C}$ , 720h.

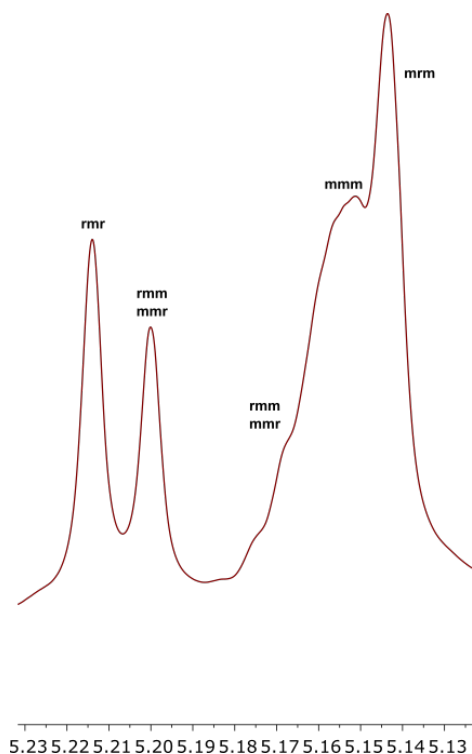

**Figure S49.** Homonuclear decoupled  $^1\text{H}$  NMR ( $\text{CDCl}_3$ , 400MHz) spectrum of the methine region of PLA obtained by polymerization of 100 eq of *rac*-LA with  $[\text{Me}_2\text{Ga}(\mu\text{-OC}_6\text{H}_4\text{OMe})]_2$  **atenolol** as an initiator, in toluene at  $40^\circ\text{C}$ , 720h.

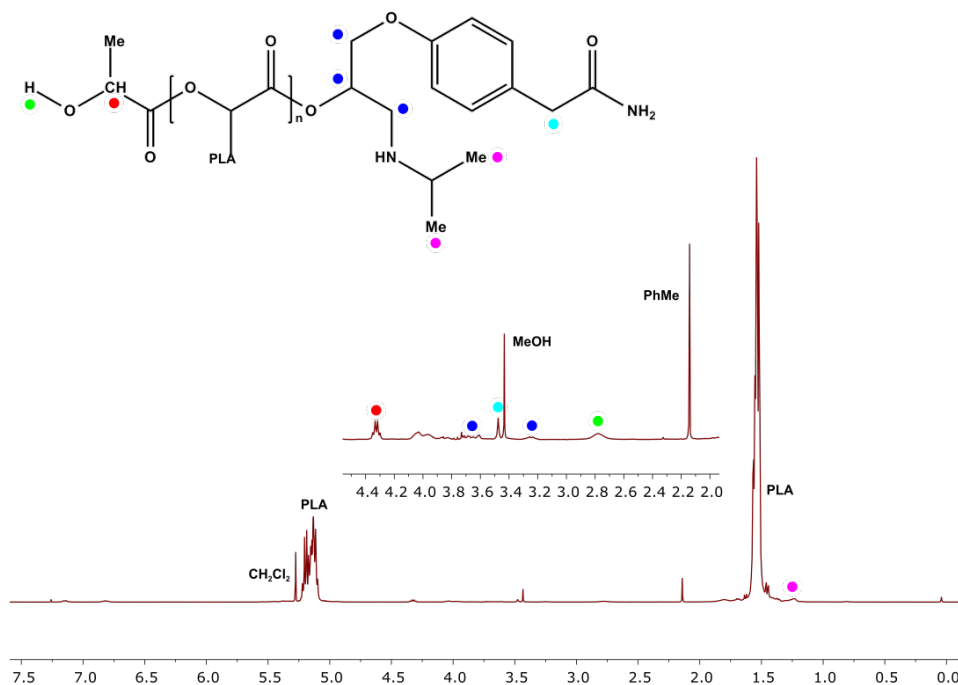

**Figure S50.**  $^1\text{H}$  NMR ( $\text{CDCl}_3$ , 400 MHz) spectra of PLA (after precipitation with methanol) obtained by polymerization of 20 eq of *rac*-LA with  $[\text{Me}_2\text{Ga}(\mu\text{-OC}_6\text{H}_4\text{OMe})]_2$  **atenolol** as an initiator, in toluene at  $70^\circ\text{C}$ , 24h; and after that the temperature was reduced to  $40^\circ\text{C}$ , **6 eq of DMAP** and 80 eq of *rac*-LA was added and reaction was carried out for additional 288h.

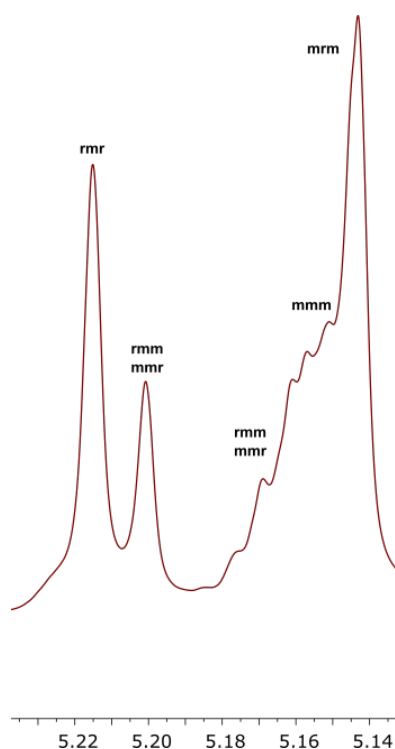

**Figure S51.** Homonuclear decoupled  $^1\text{H}$  NMR ( $\text{CDCl}_3$ , 400MHz) spectrum of the methine region of PLA (after precipitation with methanol) obtained by polymerization of 20 eq of *rac*-LA with  $[\text{Me}_2\text{Ga}(\mu\text{-OC}_6\text{H}_4\text{OMe})_2/2$  atenolol as an initiator, in toluene at  $70^\circ\text{C}$ , 24h; and after that the temperature was reduced to  $40^\circ\text{C}$ , 6 eq of DMAP and 80 eq of *rac*-LA was added and reaction was carried out for additional 288h.

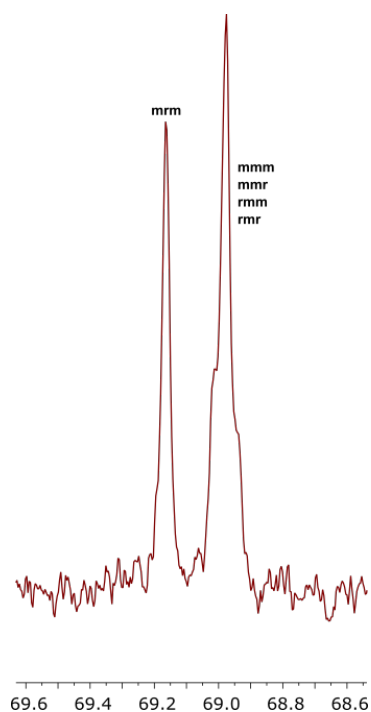

**Figure S52.**  $^{13}\text{C}$  NMR ( $\text{CDCl}_3$ , 100 MHz) spectrum of methine region of PLA (after precipitation with methanol) obtained by polymerization of 20 eq of *rac*-LA with  $[\text{Me}_2\text{Ga}(\mu\text{-OC}_6\text{H}_4\text{OMe})_2/2$  atenolol as an initiator, in toluene at  $70^\circ\text{C}$ , 24h; and after that the temperature was reduced to  $40^\circ\text{C}$ , 6 eq of DMAP and 80 eq of *rac*-LA was added and reaction was carried out for additional 288h.

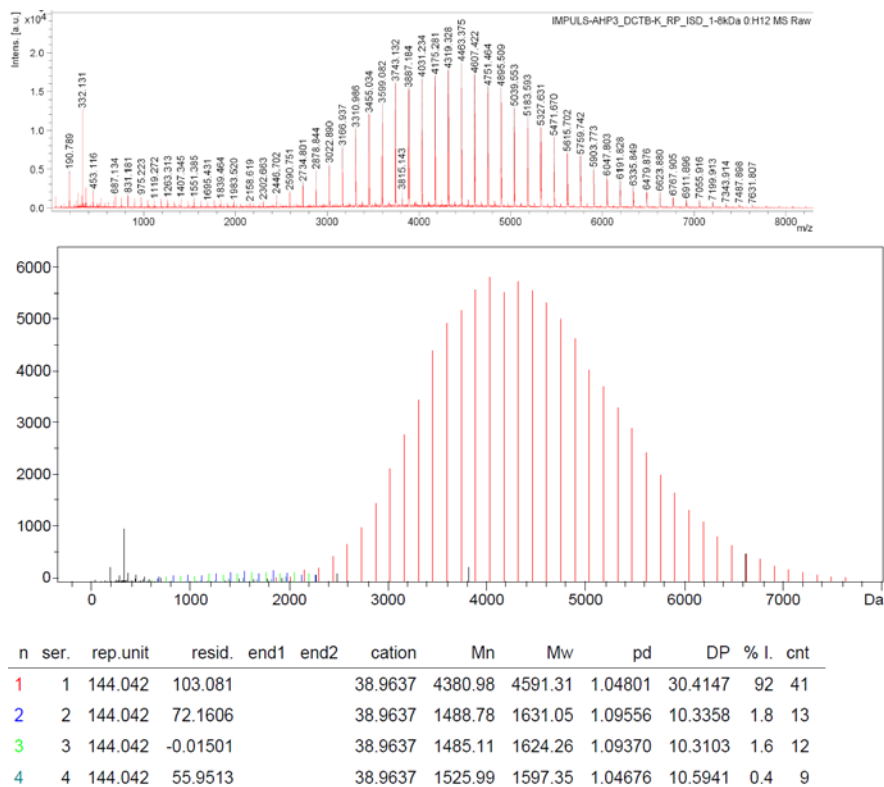

**Figure S53.** MALDI-TOF spectrum of PLA (2-(4'-Hydroxybenzeneazo)benzoic acid -HABA was used as a matrix) obtained by polymerization of 50 eq of *rac*-LA with **2** as an initiator (Table 1, entry 1), in toluene at 70°C, 24h. The main distribution refer to PLA with OH and CH<sub>2</sub>CH<sub>2</sub>NH<sup>i</sup>Pr end groups, with K<sup>+</sup>.

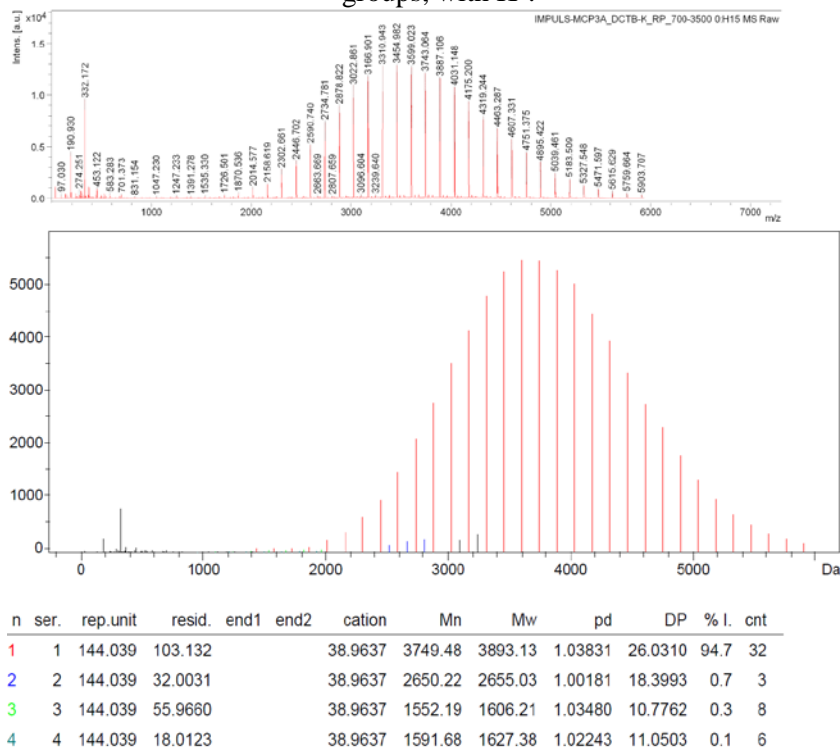

**Figure S54.** MALDI-TOF spectrum of PLA (2-(4'-Hydroxybenzeneazo)benzoic acid -HABA was used as a matrix) obtained by polymerization of 50 eq of *rac*-LA with **2** as an initiator, in toluene at 40°C, 144h (Table 1, entry 2). The main distribution refer to PLA with OH and CH<sub>2</sub>CH<sub>2</sub>NH<sup>i</sup>Pr end groups, with K<sup>+</sup>.

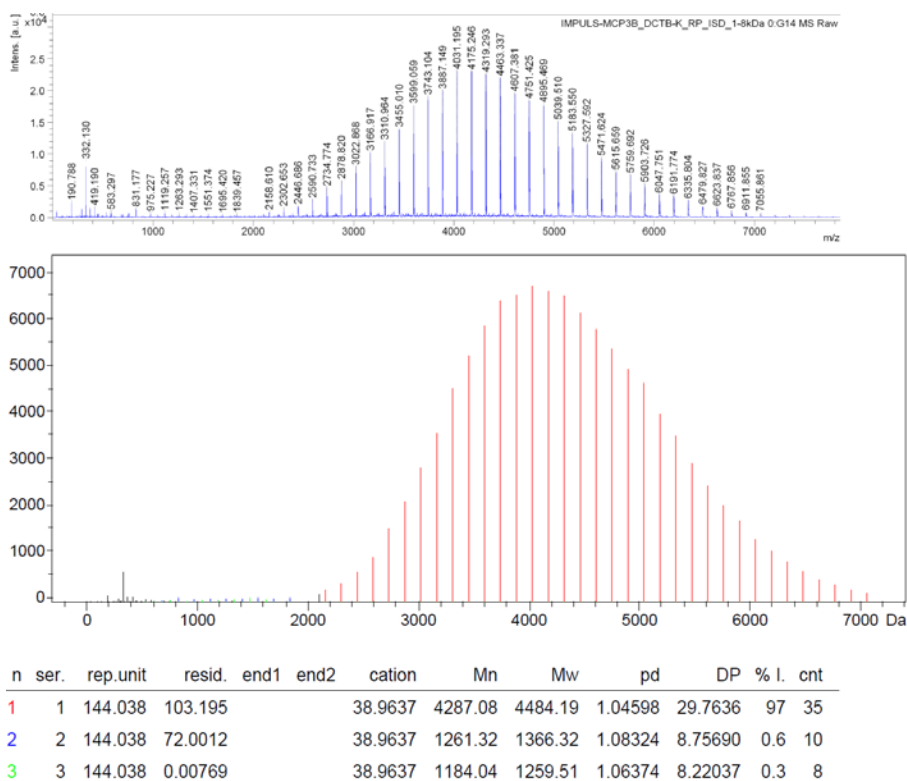

**Figure S55.** MALDI-TOF spectrum of PLA (2-(4'-Hydroxybenzeneazo)benzoic acid -HABA was used as a matrix) obtained by polymerization of 50 eq of *rac*-LA with **2/piridine 1:6** as an initiator, in toluene at 40°C, 144h (Table 1, entry 3). The main distribution refer to PLA with OH and CH<sub>2</sub>CH<sub>2</sub>NH<sup>+</sup>Pr end groups, with K<sup>+</sup>.

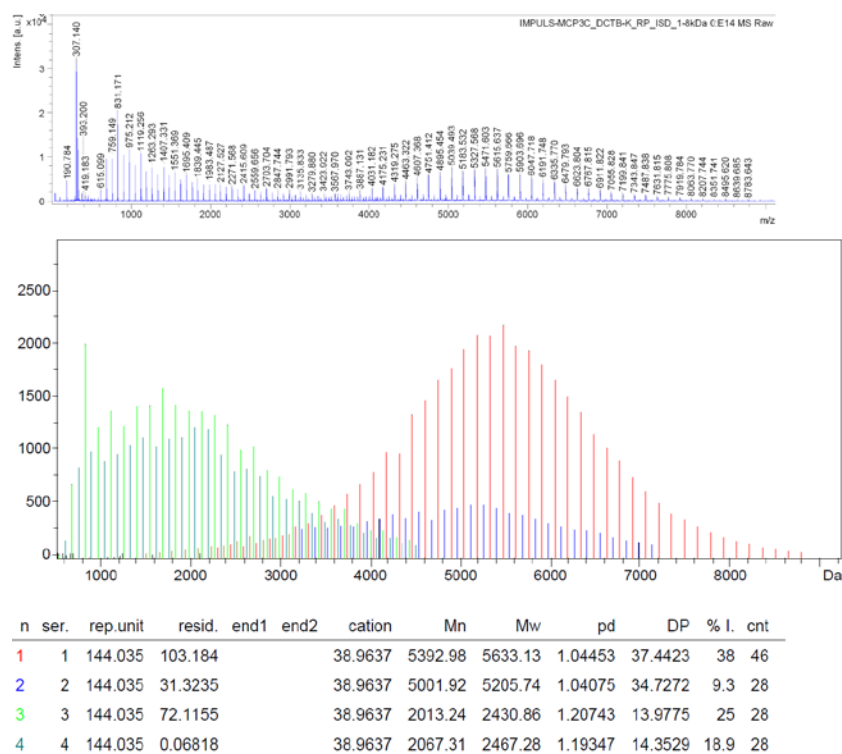

**Figure S56.** MALDI-TOF spectrum of PLA (2-(4'-Hydroxybenzeneazo)benzoic acid -HABA was used as a matrix) obtained by polymerization of 50 eq of *rac*-LA with **2/DMAP 1:6** as an initiator

(Table 1, entry 4), in toluene at 40°C, 120h. The distributions refer to PLA with OH and CH<sub>2</sub>CH<sub>2</sub>NH<sup>i</sup>Pr end groups and cyclic PLA, with K<sup>+</sup>.

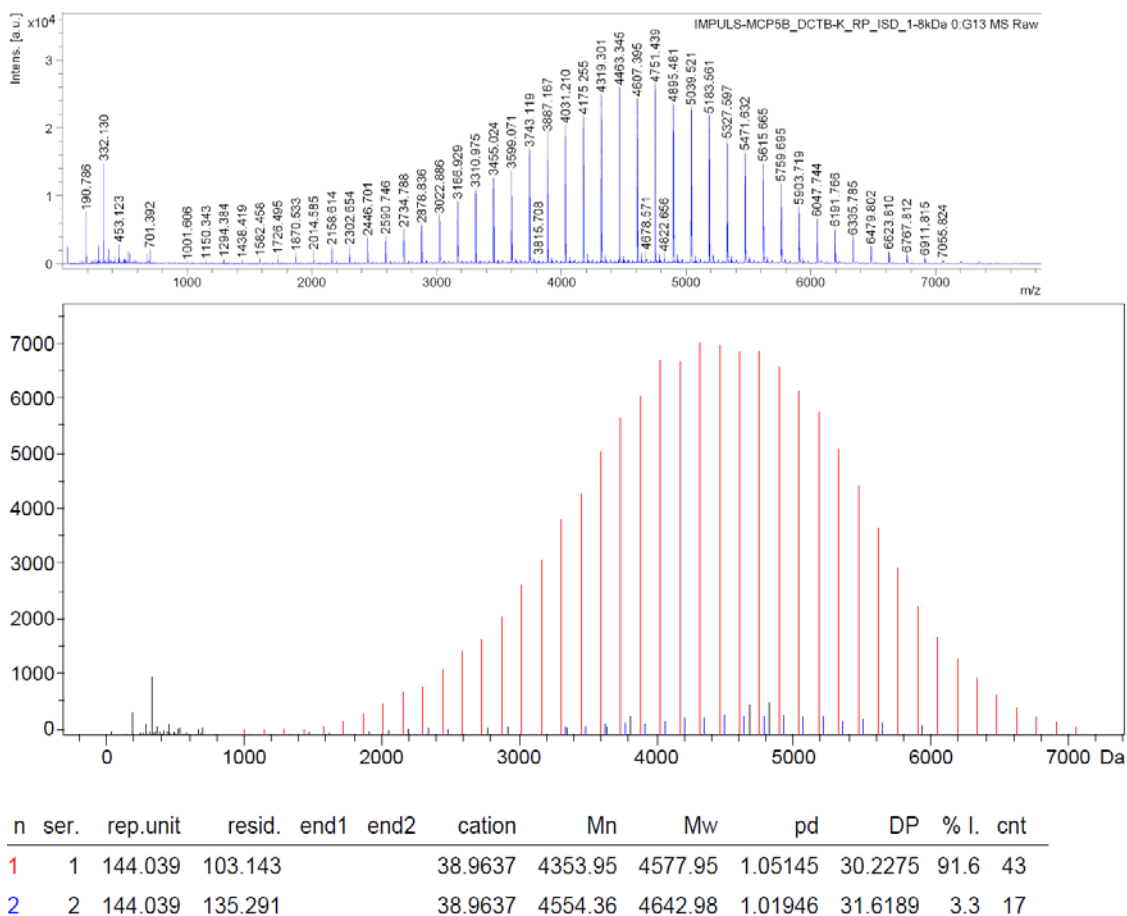

**Figure S57.** MALDI-TOF spectrum of PLA (2-(4'-Hydroxybenzeneazo)benzoic acid -HABA was used as a matrix) obtained by polymerization of 50 eq of *rac*-LA with **2/DBU 1:2** as an initiator (Table 1, entry 5), in methylene chloride at -20°C, 18h. The main distribution refer to PLA with OH and CH<sub>2</sub>CH<sub>2</sub>NH<sup>i</sup>Pr end groups, with K<sup>+</sup>.



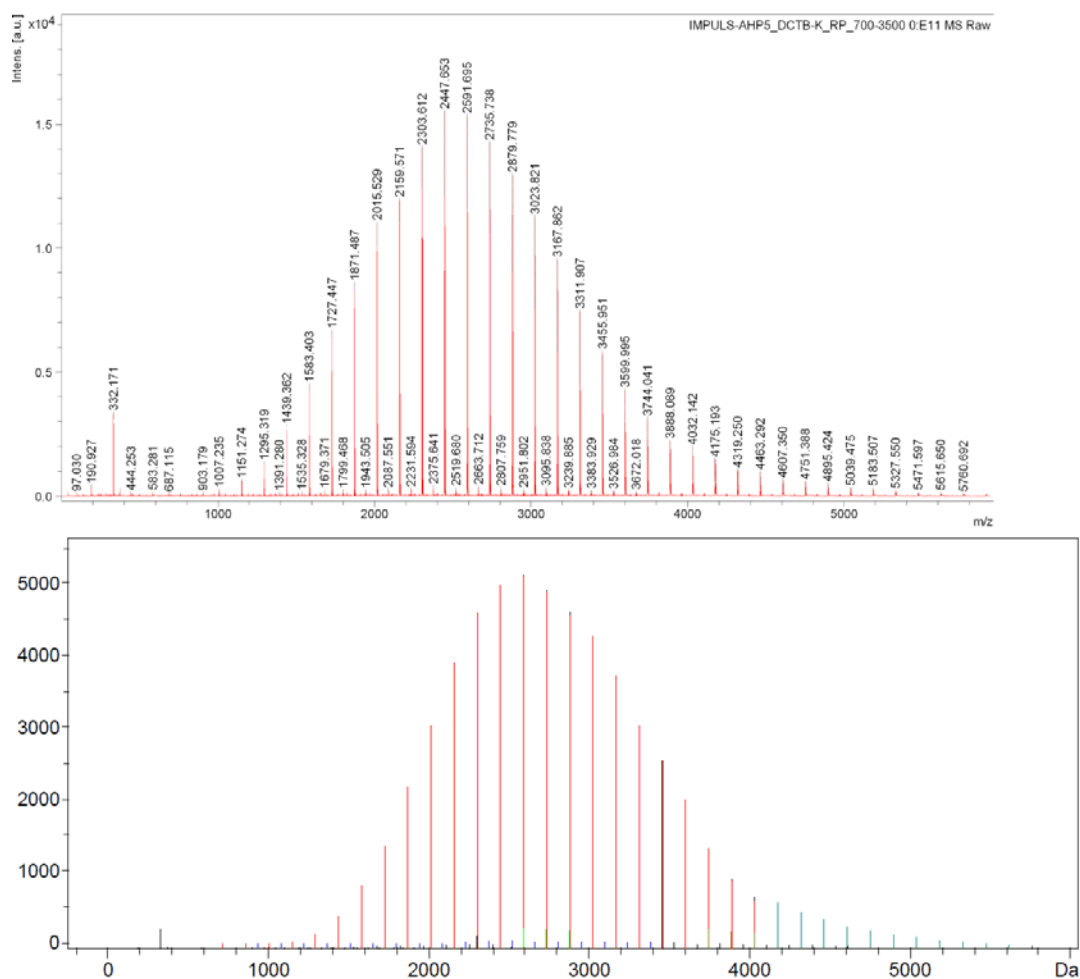

**Figure S58.** MALDI-TOF spectrum of PLA (2-(4'-Hydroxybenzeneazo)benzoic acid -HABA was used as a matrix) PLA obtained by polymerization of 50 eq of *rac*-LA with  $[\text{Me}_2\text{Ga}(\mu\text{-OCH}(\text{Me})\text{CO}_2\text{Me})_2/2$  H-B as an initiator, in toluene at 70°C, 24h (Table 2, entry 1). The main distribution refer to PLA with OH,  $\text{CH}_2\text{CH}_2\text{NH}^i\text{Pr}$  and  $\text{CH}(\text{Me})\text{C}(\text{O})\text{OMe}$  end groups, with  $\text{K}^+$ .

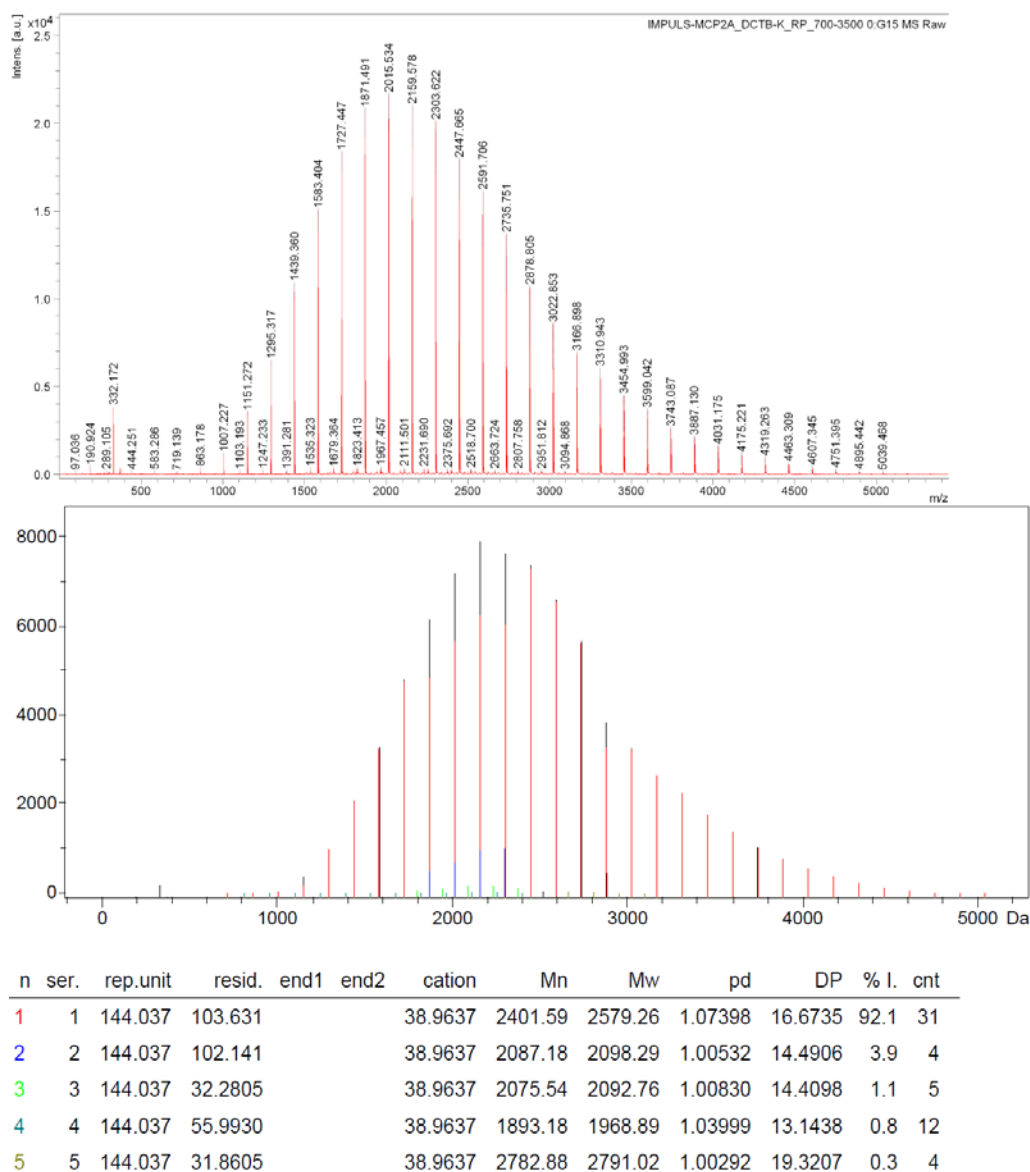

**Figure S59.** MALDI-TOF spectrum of PLA (2-(4'-Hydroxybenzeneazo)benzoic acid -HABA) was used as a matrix) obtained by polymerization of 50 eq of *rac*-LA with  $[\text{Me}_2\text{Ga}(\mu\text{-OCH}(\text{Me})\text{CO}_2\text{Me})_2]/2$  H-B as an initiator, in toluene at 40°C, 144h (Table 2, entry 2). The main distribution refer to PLA with OH,  $\text{CH}_2\text{CH}_2\text{NH}^+\text{Pr}$  and  $\text{CH}(\text{Me})\text{C}(\text{O})\text{OMe}$  end groups, with  $\text{K}^+$ .

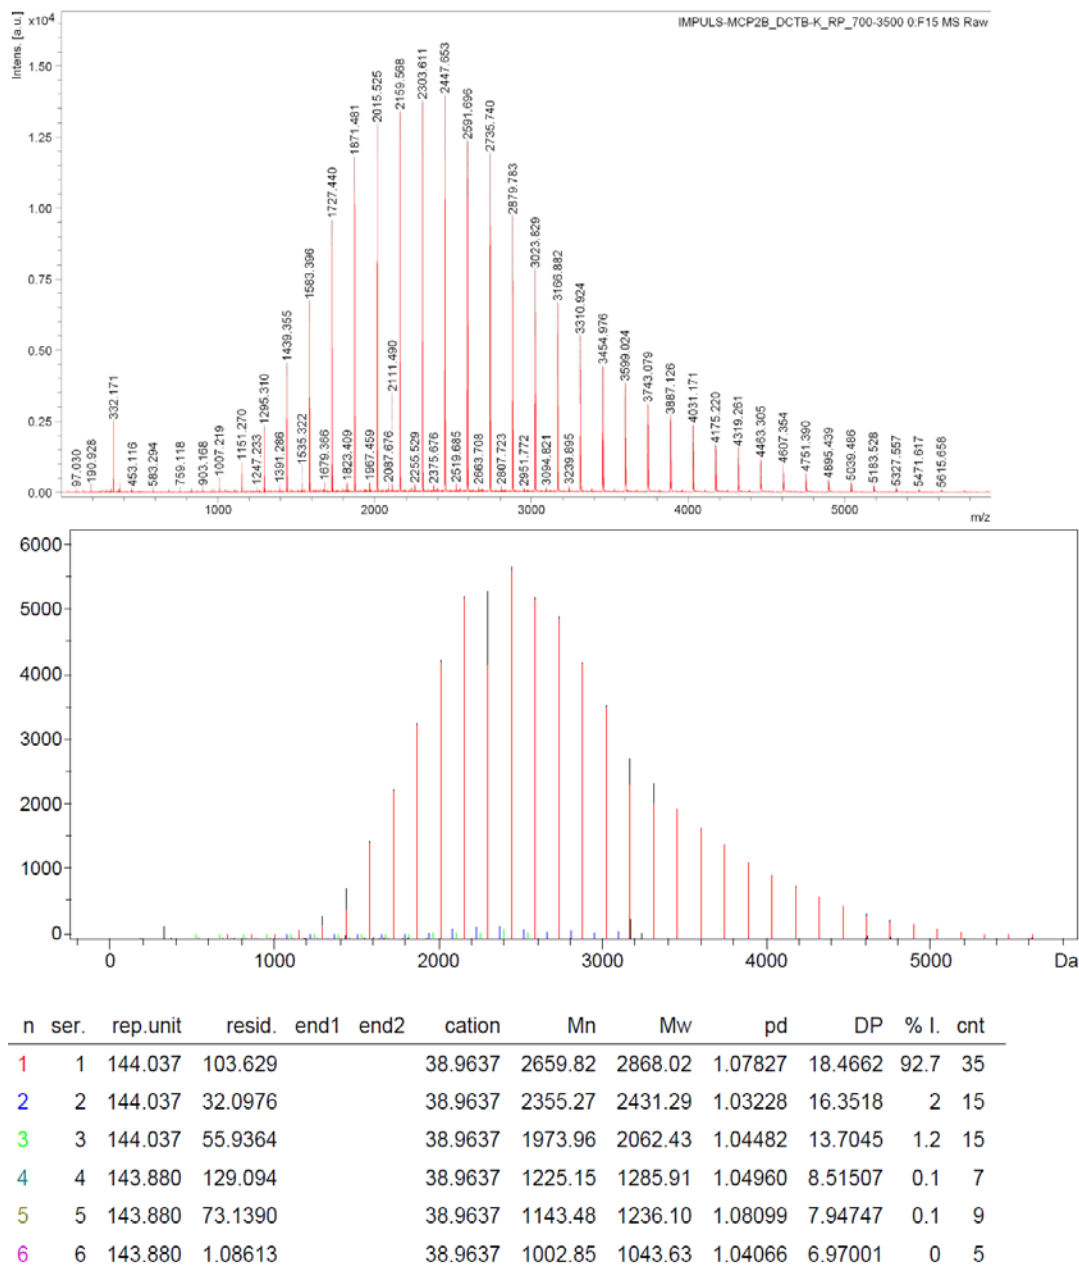

**Figure S60.** MALDI-TOF spectrum of PLA (2-(4'-Hydroxybenzeneazo)benzoic acid -HABA was used as a matrix) obtained by polymerization of 50 eq of *rac*-LA with  $[\text{Me}_2\text{Ga}(\mu\text{-OCH}(\text{Me})\text{CO}_2\text{Me})_2/2$  H-B/**pyridine 1:6** as an initiator, in toluene at 40°C, 144h (Table 2, entry 3). The main distribution refer to PLA with OH,  $\text{CH}_2\text{CH}_2\text{NH}^i\text{Pr}$  and  $\text{CH}(\text{Me})\text{C}(\text{O})\text{OMe}$  end groups, with  $\text{K}^+$ .

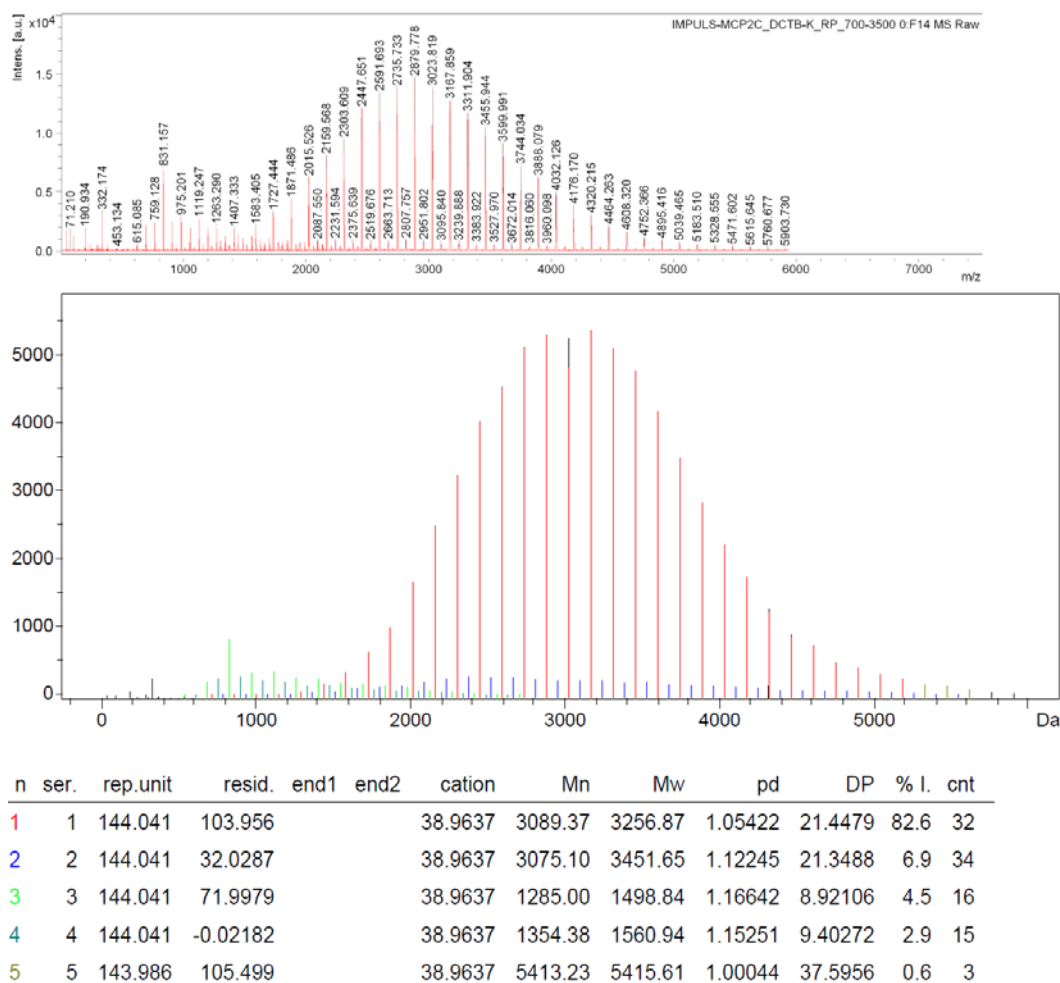

**Figure S61.** MALDI-TOF spectrum of PLA (2-(4'-Hydroxybenzeneazo)benzoic acid -HABA was used as a matrix) obtained by polymerization of 50 eq of *rac*-LA with  $[\text{Me}_2\text{Ga}(\mu\text{-OCH}(\text{Me})\text{CO}_2\text{Me})_2]$  H-B/DMAP **1:6** as an initiator, in toluene at 40°C, 120h (Table 2, entry 4). The main distribution refer to PLA with OH, CH<sub>2</sub>CH<sub>2</sub>NH<sup>i</sup>Pr and CH(Me)C(O)OMe end groups, with K<sup>+</sup>.

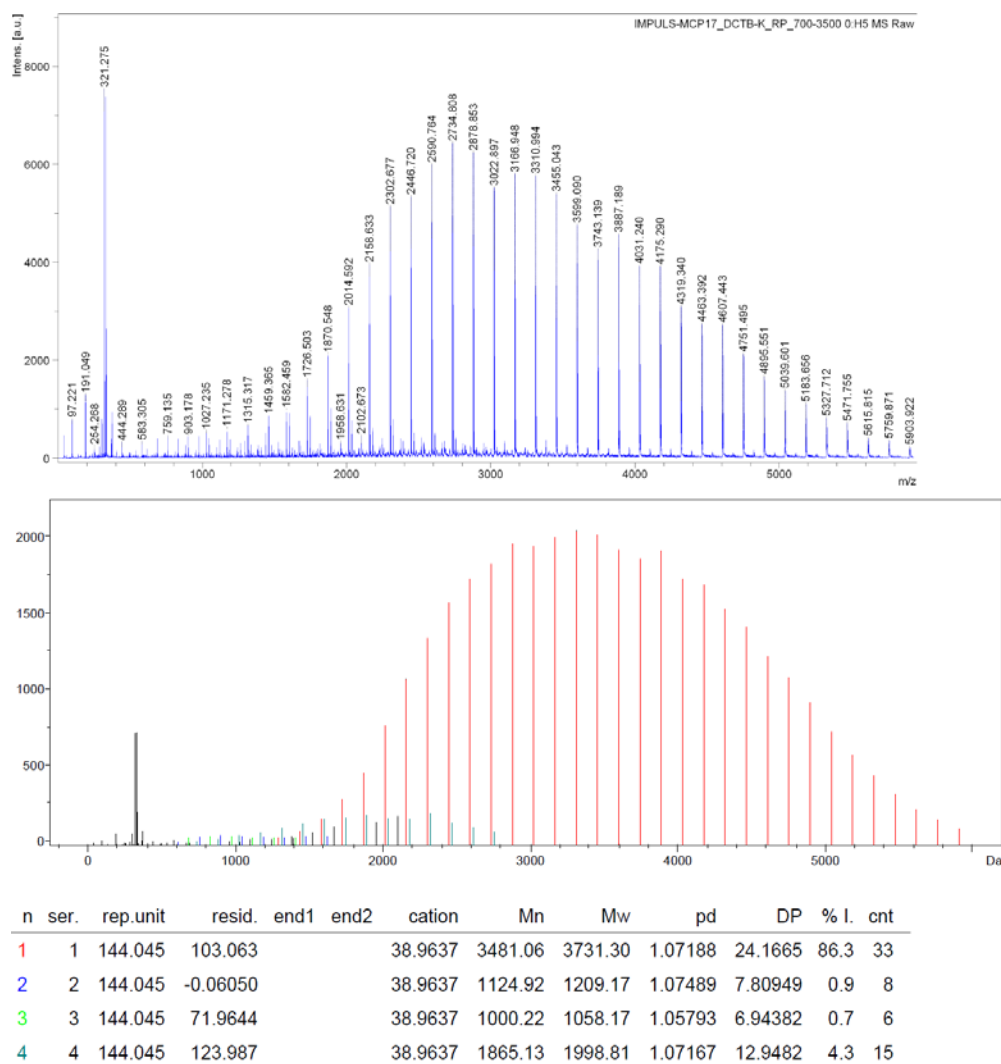

**Figure S62.** MALDI-TOF spectrum of PLA (2-(4'-Hydroxybenzeneazo)benzoic acid -HABA was used as a matrix) obtained by polymerization of 25 eq of *rac*-LA with  $[\text{Me}_2\text{Ga}(\mu\text{-OC}_6\text{H}_4\text{OMe})_2]/2$  H-**B** as an initiator, in toluene at 70°C, 24h (Table 2, entry 5). The main distribution refer to PLA with OH and  $\text{CH}_2\text{CH}_2\text{NH}^i\text{Pr}$  end groups, with  $\text{K}^+$ .

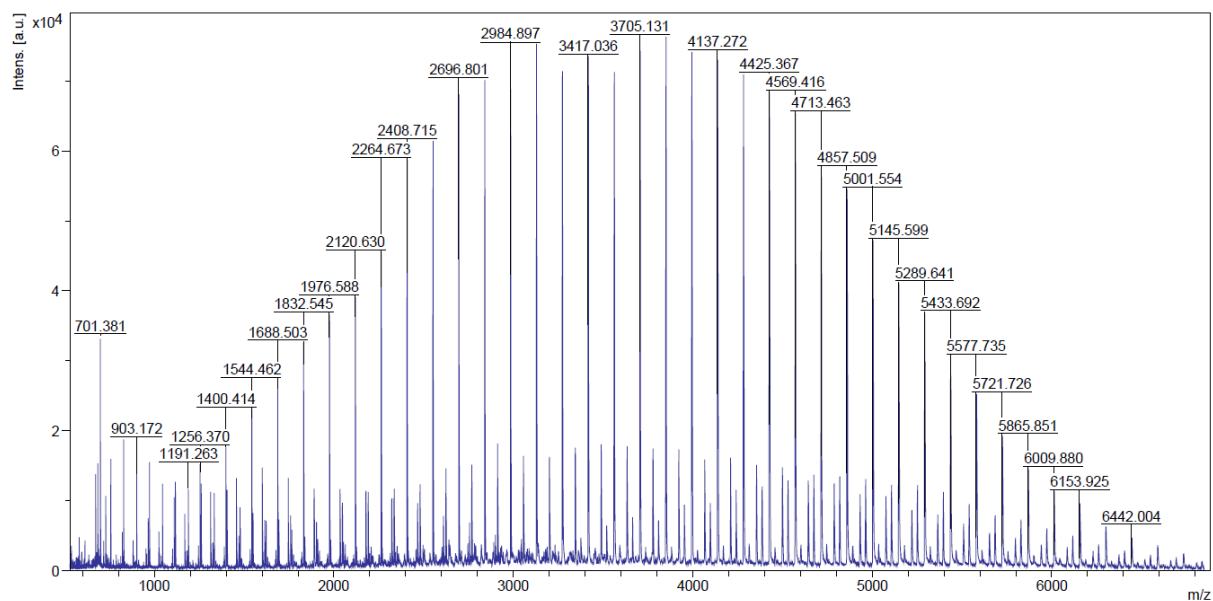

**Figure S63.** MALDI-TOF spectrum of PLA (2-(4'-Hydroxybenzeneazo)benzoic acid -HABA was used as a matrix) obtained by polymerization of 25 eq of *rac*-LA with  $[\text{Me}_2\text{Ga}(\mu\text{-OC}_6\text{H}_4\text{OMe})_2/2 \text{H-C}$  as an initiator, in toluene at 40°C, 240h (Table 2, entry 9). The main distribution refer to PLA with OH and  $\text{CH}(\text{CH}_2\text{OPh})\text{CH}_2\text{NH}^i\text{Pr}$  end groups, with  $\text{K}^+$ .

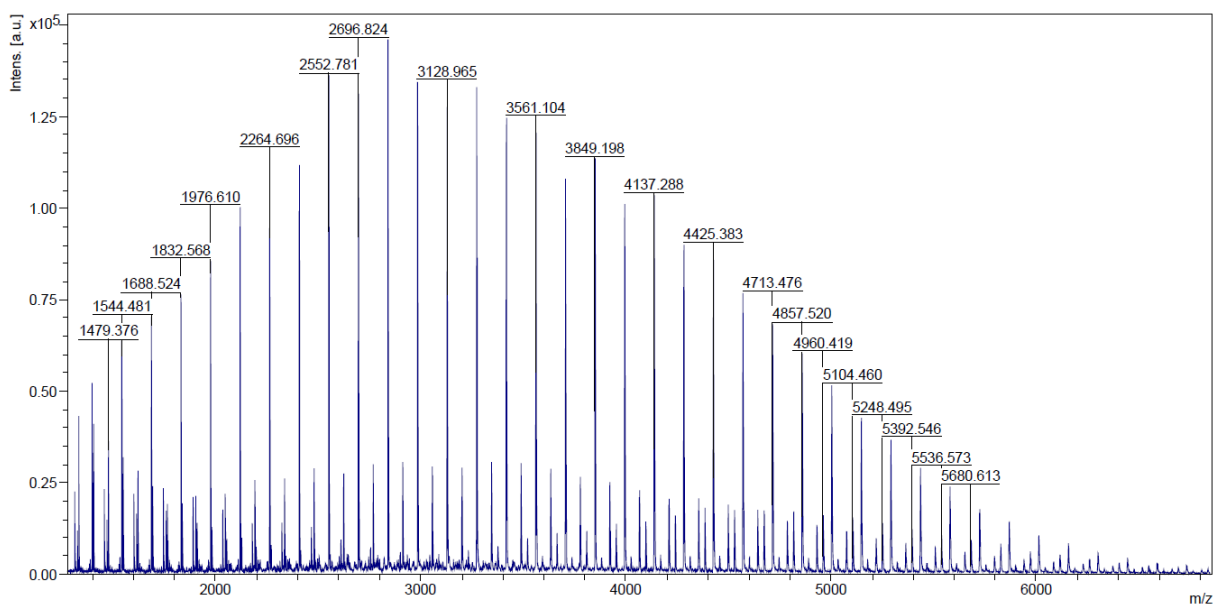

**Figure S64.** MALDI-TOF spectrum of PLA (2-(4'-Hydroxybenzeneazo)benzoic acid -HABA was used as a matrix) obtained by polymerization of 25 eq of *rac*-LA with  $[\text{Me}_2\text{Ga}(\mu\text{-OC}_6\text{H}_4\text{OMe})_2/2 \text{H-C}/\text{pyridine } 1:6$  as an initiator, in toluene at 40°C, 240h (Table 2, entry 10). The main distribution refer to PLA with OH and  $\text{CH}(\text{CH}_2\text{OPh})\text{CH}_2\text{NH}^i\text{Pr}$  end groups, with  $\text{K}^+$ .

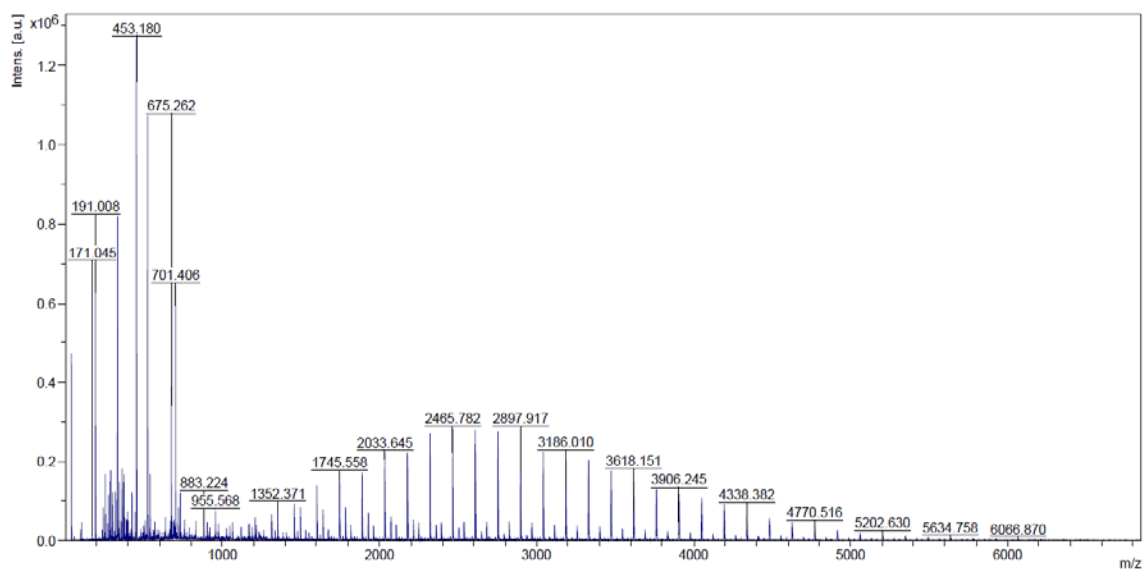

**Figure S65.** MALDI–TOF spectrum of PLA (2-(4'-Hydroxybenzeneazo)benzoic acid -HABA was used as a matrix) obtained by polymerization of 25 eq of *rac*-LA with  $[\text{Me}_2\text{Ga}(\mu\text{-OC}_6\text{H}_4\text{OMe})_2]/\text{atenolol}$  as an initiator, in toluene at 70°C, 24h (Table 2, entry 11). The main distribution refer to PLA with OH and atenolol end groups, with  $\text{K}^+$ .

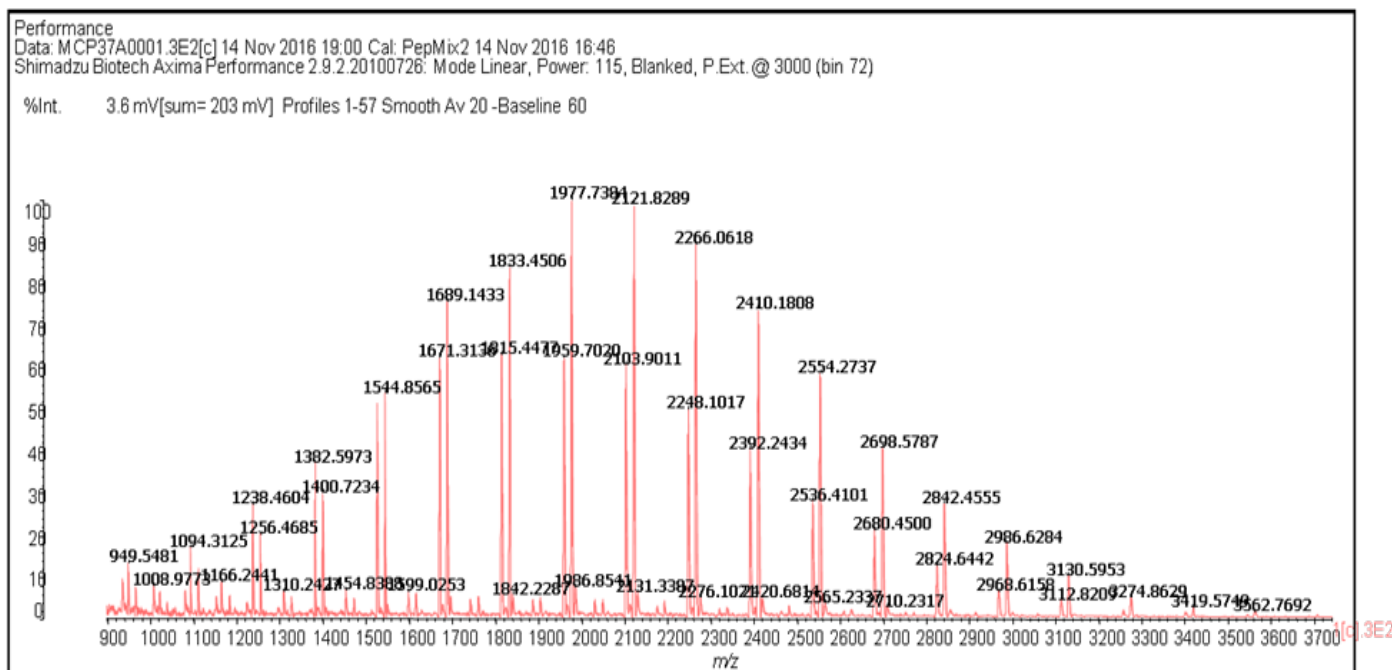

**Figure S66** MALDI–TOF spectrum of PLA obtained by polymerization of 25 eq of *rac*-LA with  $[\text{Me}_2\text{Ga}(\mu\text{-OC}_6\text{H}_4\text{OMe})_2]/2 \text{ H-B}/\gamma\text{-picoline } 1:6$  as an initiator, in toluene at 40°C, 144h (Table 2, entry 7). The main distribution refer to PLA with OH and  $\text{CH}_2\text{CH}_2\text{NH}_2$  end groups (due to, most probably side reaction with matrix), with  $\text{K}^+$ . PDI = 1.53 (based on GPC analysis).

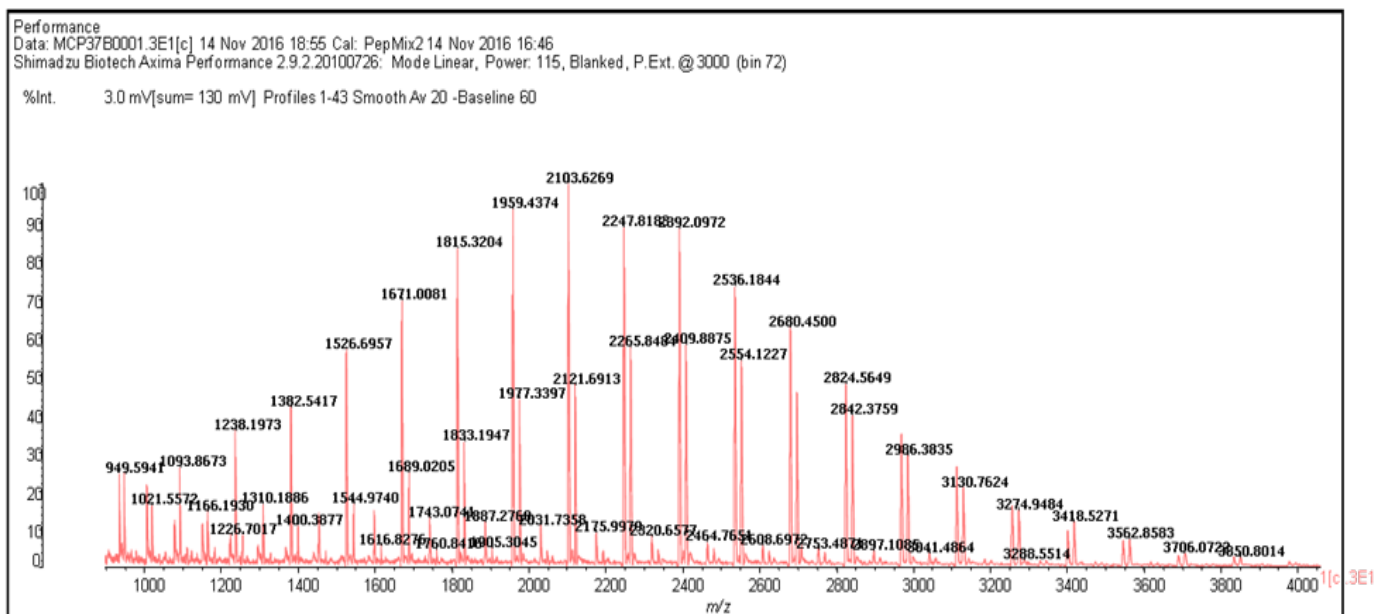

**Figure S67** MALDI–TOF spectrum of PLA obtained by polymerization of 25 eq of *rac*-LA with  $[\text{Me}_2\text{Ga}(\mu\text{-OC}_6\text{H}_4\text{OMe})_2/2 \text{H-B}/\gamma\text{-picoline}]_1:60$  as an initiator, in toluene at 40°C, 144h (Table 2, entry 8). The main distribution refer to PLA with OH and  $\text{CH}_2\text{CH}_2\text{NH}_2$  end groups (due to, most probably side reaction with matrix), with  $\text{K}^+$ . PDI = 1.46 (based on GPC analysis).

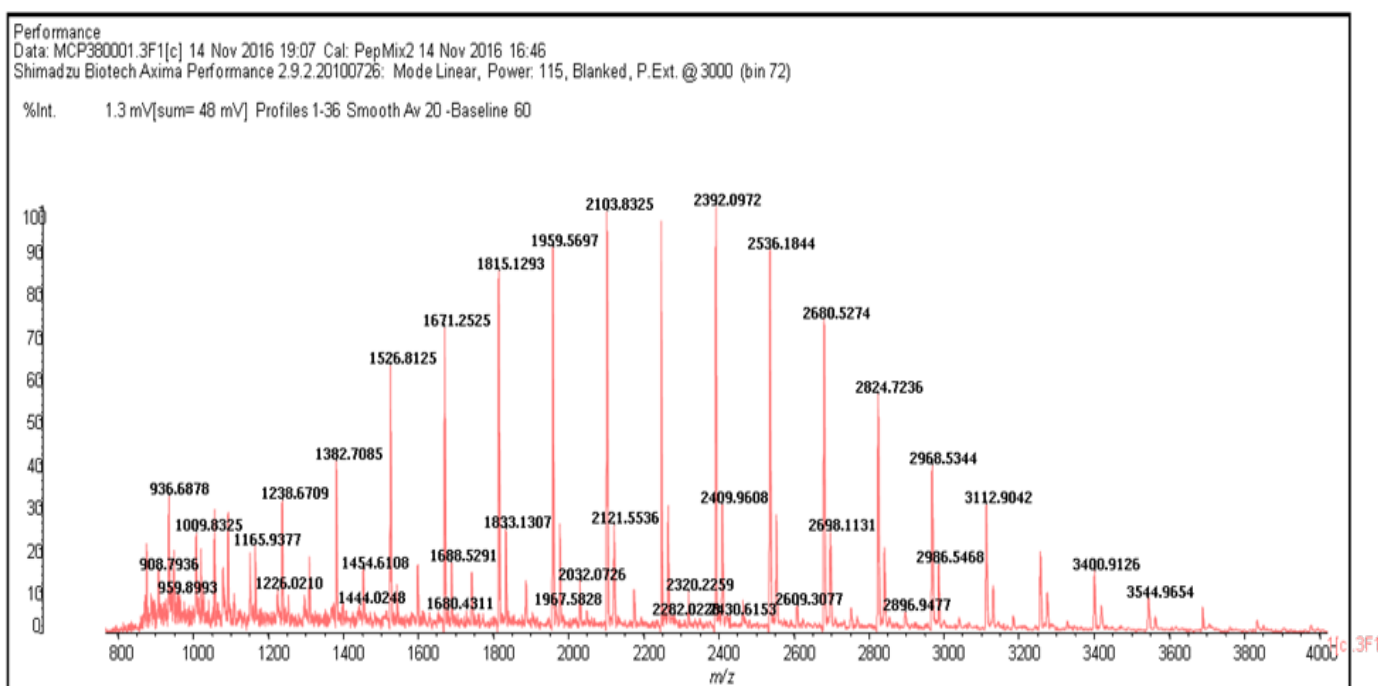

**Figure S68** MALDI–TOF spectrum of PLA obtained by polymerization of 25 eq of *rac*-LA with  $[\text{Me}_2\text{Ga}(\mu\text{-OC}_6\text{H}_4\text{OMe})_2/2 \text{H-B}/\gamma\text{-pyridine}]_1:60$  as an initiator, in toluene at 40°C, 144h (Table 2, entry 6). The main distribution refer to PLA with OH and  $\text{CH}_2\text{CH}_2\text{NH}_2$  end groups (due to, most probably side reaction with matrix), with  $\text{K}^+$ . PDI = 1.43 (based on GPC analysis).



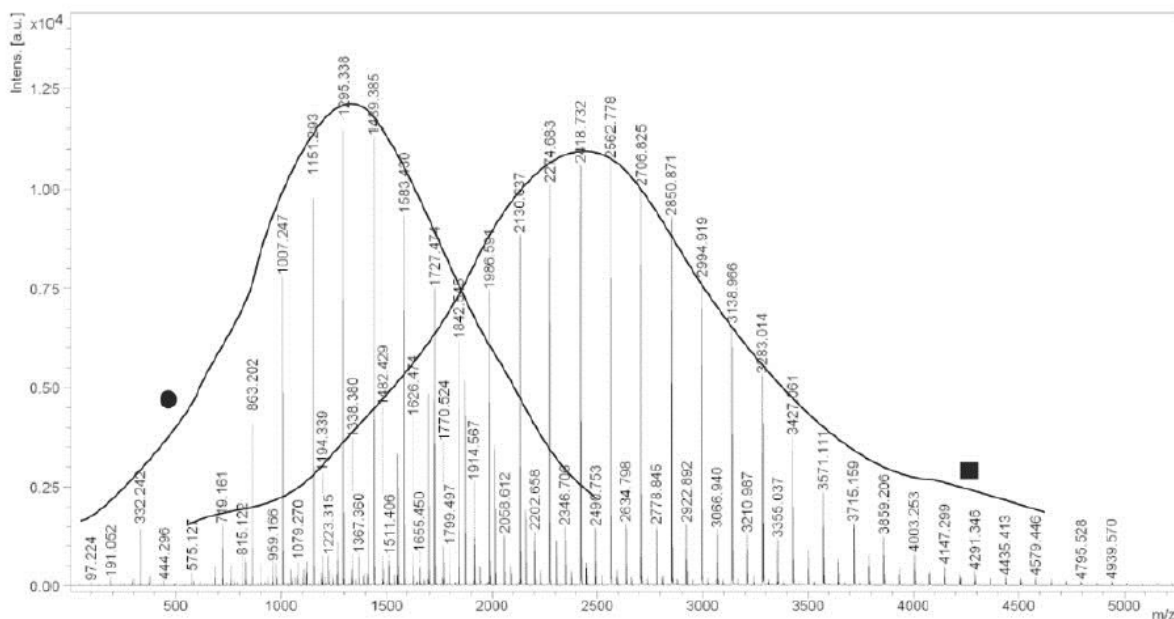

**Figure S69.** MALDI-TOF spectrum of PLA (2-(4'-Hydroxybenzeneazo)benzoic acid -HABA was used as a matrix) obtained by polymerization of 25 eq of *rac*-LA with  $[\text{Me}_2\text{Ga}(\mu\text{-OCH}(\text{Me})\text{CO}_2\text{Me})_2/2 \text{H-A}]$  as an initiator, in toluene at 70°C, 22h. The main distribution refer to PLA with OH,  $\text{CH}_2\text{CH}_2\text{NHMe}$  and  $\text{CH}(\text{Me})\text{C}(\text{O})\text{OMe}$  end groups, with  $\text{K}^+$ . PDI = 1.37 (based on GPC analysis).

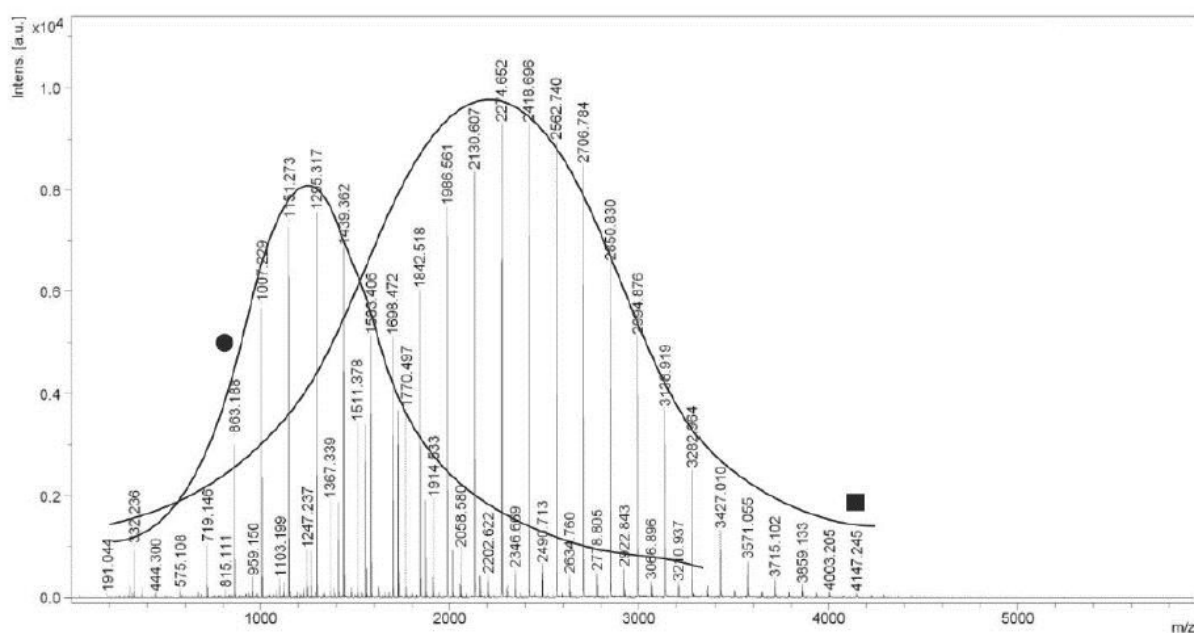

**Figure S70.** MALDI-TOF spectrum of PLA (2-(4'-Hydroxybenzeneazo)benzoic acid -HABA was used as a matrix) obtained by polymerization of 25 eq of *rac*-LA with  $[\text{Me}_2\text{Ga}(\mu\text{-OCH}(\text{Me})\text{CO}_2\text{Me})_2/2 \text{H-A}]$  as an initiator, in toluene at 40°C, 168h. The main distribution refer to PLA with OH,  $\text{CH}_2\text{CH}_2\text{NHMe}$  and  $\text{CH}(\text{Me})\text{C}(\text{O})\text{OMe}$  end groups, with  $\text{K}^+$ . PDI = 1.33 (based on GPC analysis).

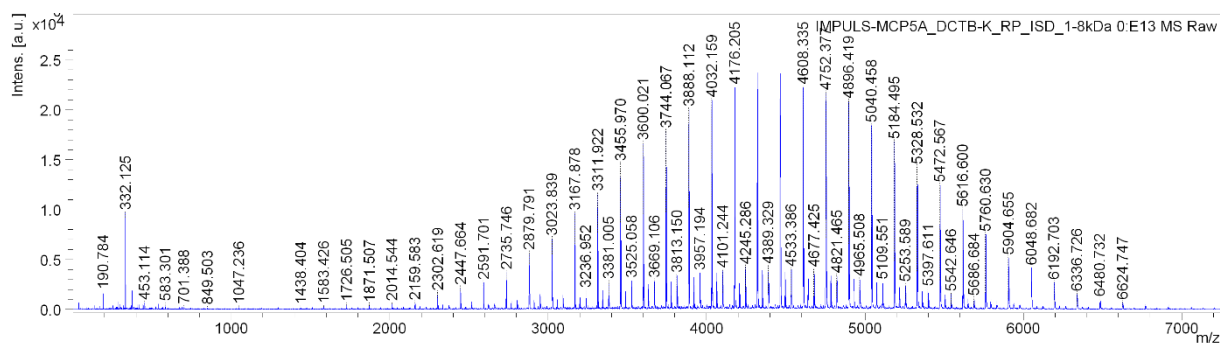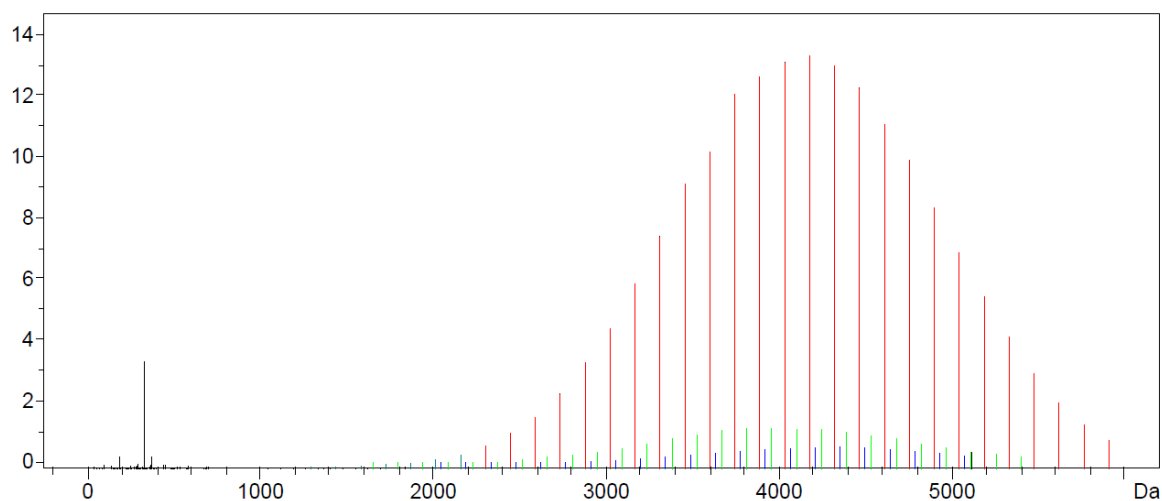

| n | ser. | rep.unit | resid.  | end1 | end2 | cation  | Mn      | Mw      | pd      | DP      | % I. | cnt |
|---|------|----------|---------|------|------|---------|---------|---------|---------|---------|------|-----|
| 1 | 1    | 144.043  | 104.027 |      |      | 38.9637 | 4105.23 | 4234.18 | 1.03141 | 28.5001 | 83.5 | 27  |
| 2 | 2    | 144.043  | 135.166 |      |      | 38.9637 | 3943.59 | 4072.64 | 1.03272 | 27.3779 | 4    | 22  |
| 3 | 3    | 144.043  | 29.2344 |      |      | 38.9637 | 3889.23 | 4042.45 | 1.03940 | 27.0005 | 8.3  | 27  |
| 4 | 4    | 144.043  | 103.038 |      |      | 38.9637 | 1894.15 | 1925.55 | 1.01658 | 13.1499 | 0.5  | 7   |

**Figure S71.** MALDI-TOF spectrum of PLA (2-(4'-Hydroxybenzeneazo)benzoic acid -HABA was used as a matrix) obtained by polymerization of 50 eq of *rac*-LA with  $[\text{Me}_2\text{Ga}(\mu\text{-OCH}(\text{Me})\text{CO}_2\text{Me})_2/2 \text{H-B}/2 \text{DBU}]$  as an initiator, in methylene chloride at  $-20^\circ\text{C}$ , 6h. The main distribution refer to PLA ( $P_r =$  with OH,  $\text{CH}_2\text{CH}_2\text{NH}^i\text{Pr}$  and  $\text{CH}(\text{Me})\text{C}(\text{O})\text{OMe}$  end groups, with  $\text{K}^+$ ).

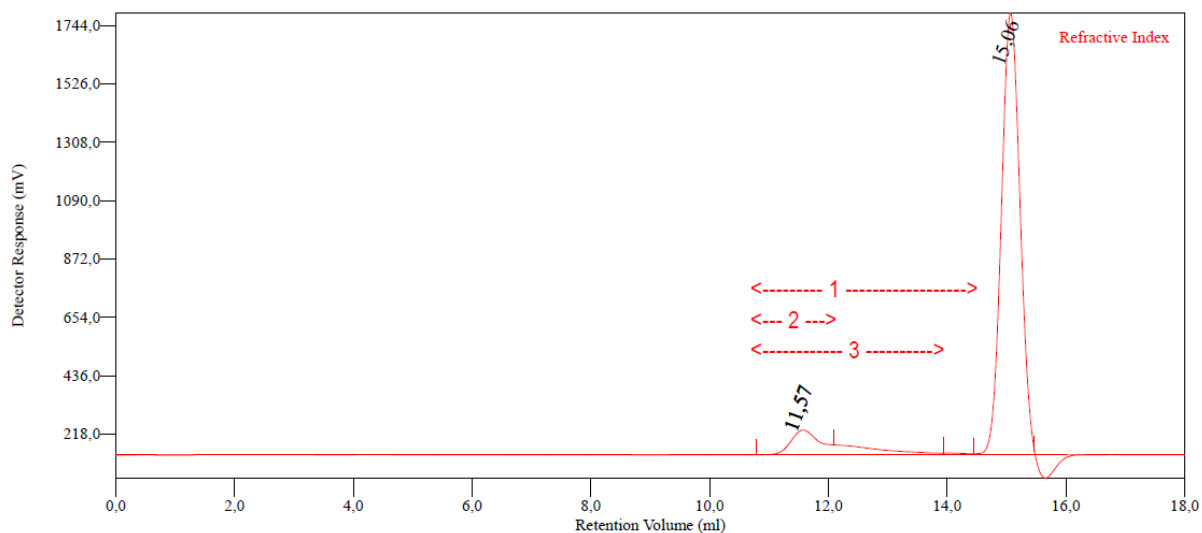

<1>      <2>      <3>

Conventional Calibration - Homopolymers : Results

|                   |        |         |         |        |
|-------------------|--------|---------|---------|--------|
| Peak RV - (ml)    | 11.567 | 11.567  | 11.570  | 15.057 |
| Mn - (Daltons)    | 1 302  | 7 175   | 1 986   | 0      |
| Mw - (Daltons)    | 5 274  | 7 926   | 5 420   | 0      |
| Mz - (Daltons)    | 7 878  | 8 724   | 7 853   | 0      |
| Mp - (Daltons)    | 8 196  | 8 188   | 8 168   | 0      |
| Mw / Mn           | 4.048  | 1.105   | 2.728   | 0.000  |
| Percent Above Mw: | 0      | 100.000 | 100.000 | 0.000  |
| Percent Below Mw: | 0      | 0.000   | 0.000   | 0.000  |
| Mw 10.0% Low      | 296    | 4 305   | 471     | 0      |
| Mw 10.0% High     | 11 913 | 12 846  | 11 910  | 0      |
| Wt Fr (Peak)      | 0.393  | 0.226   | 0.381   | 0.000  |
| RI Area - (mvml)  | 88.92  | 51.13   | 86.18   | 597.88 |
| UV Area - (mvml)  | 0.00   | 0.00    | 0.00    | 0.00   |

| Annotation               |                              |
|--------------------------|------------------------------|
| Method File              | CC_PS_RI_fm_2016-01-0003.vcm |
| Limits File              |                              |
| Date Acquired            | Jan 22, 2016 - 12:17:58      |
| Solvent                  | Chlorek metyleni             |
| Acquisition Operator     | admin : Administrator        |
| Calculation Operator     | ap : Andrzej Plichta (5632)  |
| Column Set               | Jordi DVB G+MB               |
| System                   | TDA G+MB                     |
| Flow Rate - (ml/min)     | 1.000                        |
| Inj Volume - (ul)        | 65.0                         |
| Volume Increment - (ml)  | 0.00333                      |
| Detector Temp. - (deg C) | 30.0                         |
| Column Temp. - (deg C)   | 30.0                         |
| OmniSEC Build Number     | 406                          |

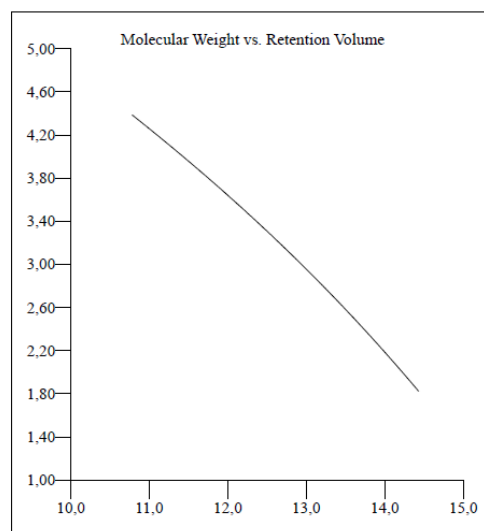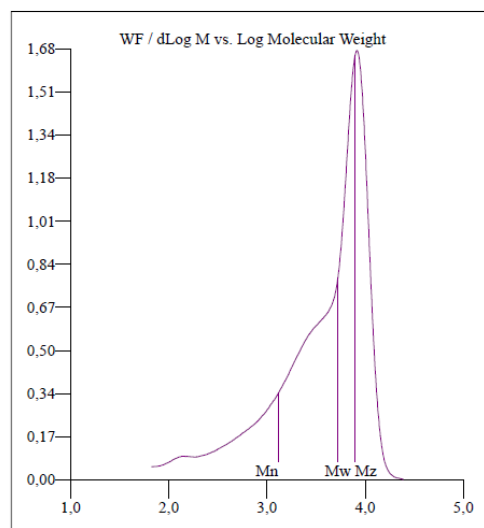

**Figure S72.** GPC data for PLA obtained by polymerization of 50 eq of *rac*-LA with  $[\text{Me}_2\text{Ga}(\mu\text{-OCH}(\text{Me})\text{CO}_2\text{Me})_2/2 \text{H-B}/2 \text{DBU}]$  as an initiator, in methylene chloride at  $-20^\circ\text{C}$ , 6h.

## Crystal structure determination

Single crystals suitable for X-ray diffraction studies were selected under a polarizing microscope, mounted in inert oil and transferred to the Oxford Diffraction  $\kappa$ -CCD Gemini A Ultra diffractometer. Cell refinement and data collection as well as data reduction and analysis were performed with the CRYSTALIS<sup>PRO</sup> software.[<sup>2</sup>]. Using Olex2 [<sup>3</sup>], the structures were solved with ShelXT[<sup>4</sup>] structure solution program and refined with the ShelXL–2014[<sup>5</sup>] refinement package using Least Squares minimization. The crystal data and experimental parameters are summarized in Table S1, Supporting information. CCDC1569393-CCDC1569395 contain the supplementary crystallographic data for this paper. These data can be obtained free of charge from The Cambridge Crystallographic Data Centre via [www.ccdc.cam.ac.uk/data\\_request/cif](http://www.ccdc.cam.ac.uk/data_request/cif).

**Table S1** Crystal data and structure refinement details

| Compound                                                                        | <b>1</b>                                                                      | <b>2</b>                                                                      | <b>3</b>                                                                      |
|---------------------------------------------------------------------------------|-------------------------------------------------------------------------------|-------------------------------------------------------------------------------|-------------------------------------------------------------------------------|
| Chemical formula                                                                | C <sub>10</sub> H <sub>28</sub> Ga <sub>2</sub> N <sub>2</sub> O <sub>2</sub> | C <sub>14</sub> H <sub>36</sub> Ga <sub>2</sub> N <sub>2</sub> O <sub>2</sub> | C <sub>28</sub> H <sub>48</sub> Ga <sub>2</sub> N <sub>2</sub> O <sub>4</sub> |
| Formula Mass                                                                    | 347.78                                                                        | 403.89                                                                        | 616.12                                                                        |
| Crystal system                                                                  | monoclinic                                                                    | monoclinic                                                                    | monoclinic                                                                    |
| <i>a</i> /Å                                                                     | 6.6946(3)                                                                     | 6.4969(2)                                                                     | 21.4049(7)                                                                    |
| <i>b</i> /Å                                                                     | 10.7516(5)                                                                    | 13.5023(4)                                                                    | 8.2553(3)                                                                     |
| <i>c</i> /Å                                                                     | 11.4183(5)                                                                    | 11.1683(4)                                                                    | 18.0932(5)                                                                    |
| $\alpha$ /°                                                                     | 90                                                                            | 90                                                                            | 90                                                                            |
| $\beta$ /°                                                                      | 95.446(4)                                                                     | 95.288(3)                                                                     | 100.559(3)                                                                    |
| $\gamma$ /°                                                                     | 90                                                                            | 90                                                                            | 90                                                                            |
| Unit cell volume/ Å <sup>3</sup>                                                | 818.15(6)                                                                     | 975.55(5)                                                                     | 3143.00(18)                                                                   |
| Temperature/K                                                                   | 120.0(1)                                                                      | 120.0(1)                                                                      | 293(1)                                                                        |
| Space group                                                                     | <i>P</i> 21/ <i>n</i>                                                         | <i>P</i> 21/ <i>n</i>                                                         | <i>C</i> 2/ <i>c</i>                                                          |
| No. of formula units per unit cell, <i>Z</i>                                    | 2                                                                             | 2                                                                             | 4                                                                             |
| Radiation type                                                                  | MoK $\alpha$                                                                  | MoK $\alpha$                                                                  | MoK $\alpha$                                                                  |
| Absorption coefficient, $\mu$ /mm <sup>-1</sup>                                 | 3.285                                                                         | 2.765                                                                         | 1.746                                                                         |
| No. of reflections measured                                                     | 6987                                                                          | 15974                                                                         | 16888                                                                         |
| No. of independent reflections                                                  | 1672                                                                          | 2331                                                                          | 3096                                                                          |
| <i>R</i> <sub>int</sub>                                                         | 0.0564                                                                        | 0.0438                                                                        | 0.0222                                                                        |
| Final <i>R</i> <sub><i>I</i></sub> values ( <i>I</i> > 2 $\sigma$ ( <i>I</i> )) | 0.0356                                                                        | 0.0206                                                                        | 0.0221                                                                        |

|                                             |             |             |             |
|---------------------------------------------|-------------|-------------|-------------|
| Final $wR(F^2)$ values ( $I > 2\sigma(I)$ ) | 0.0912      | 0.0508      | 0.0584      |
| Final $R_I$ values (all data)               | 0.0419      | 0.0244      | 0.0269      |
| Final $wR(F^2)$ values (all data)           | 0.0984      | 0.0526      | 0.0620      |
| Goodness of fit on $F^2$                    | 1.147       | 1.071       | 1.063       |
| CCD number                                  | CCDC1569393 | CCDC1569394 | CCDC1569395 |

---

<sup>1</sup> P. Horeglad, P. Kruk and J. Pécaut, *Organometallics*, 2010, **29**, 3729.

<sup>2</sup> CRYSTALIS<sup>PRO</sup> Software system, Rigaku, Oxford, UK, 2016

<sup>3</sup> O. V. Dolomanov, L. J. Bourhis, R. J. Gildea, J. A. K. Howard, H. Puschmann, *J. Appl. Cryst.*, 2009, **42**, 339-341

<sup>4</sup> G. M. Sheldrick, *Acta Cryst.*, 2015, **A71**, 3-8

<sup>5</sup> Sheldrick, G.M. *Acta Cryst.*, 2015, **C71**, 3-8
